1 **Non-helical *Helicobacter pylori* show altered gland colonization and elicit less gastric**  
2 **pathology during chronic infection**

3  
4 Laura E. Martínez<sup>1,2</sup>, Valerie P. O'Brien<sup>2</sup>, Christina K. Leverich<sup>2</sup>, Sue E. Knoblauch<sup>3</sup>, Nina R.  
5 Salama<sup>1,2\*</sup>

6  
7 <sup>1</sup>Graduate Program in Pathobiology, Department of Global Health, University of Washington,  
8 Seattle, WA, 98195, USA.

9 <sup>2</sup>Division of Human Biology, Fred Hutchinson Cancer Research Center, Seattle, WA, 98109,  
10 USA.

11 <sup>3</sup>Department of Veterinary Biosciences, The Ohio State University, Columbus, OH, 43210, USA.

12 \*Correspondence to: [nsalama@fredhutch.org](mailto:nsalama@fredhutch.org)

13  
14 **Keywords:** *Helicobacter pylori*, helical cell shape, gastric colonization, pathology, chronic  
15 infection

16  
17 **Running title:** Non-helical *Helicobacter pylori* elicit less pathology

18  
19 Current address for Laura E. Martínez: University of California Los Angeles, Los Angeles, CA  
20 90095

21  
22 **Abstract**

23  
24 Half of all humans harbor *Helicobacter pylori* in their stomachs. Helical cell shape is thought to  
25 facilitate *H. pylori*'s ability to bore into the protective mucus layer in a corkscrew-like motion,  
26 thus enhancing colonization of the stomach. *H. pylori* cell shape mutants show impaired  
27 colonization of the mouse stomach, highlighting the importance of cell shape in infection. To gain  
28 a deeper understanding of how helical cell morphology promotes host colonization by *H. pylori*,  
29 we used 3D-confocal microscopy to visualize the clinical isolate PMSS1 and an isogenic straight  
30 rod mutant ( $\Delta csd6$ ) within thick longitudinal mouse stomach sections and performed volumetric  
31 image analysis to quantify the number of bacteria residing within corpus and antral glands in  
32 addition to measuring total colony forming units (CFU). We found that straight rods show  
33 attenuation during acute colonization of the stomach (one day or one week post-infection) as  
34 measured by total CFU. Our quantitative imaging revealed that wild-type bacteria extensively  
35 colonized antral glands at one week post-infection, while *csd6* mutants showed variable  
36 colonization of the antrum at this timepoint. During chronic infection (one or three months post-  
37 infection), total CFU were highly variable, but similar for wild-type and straight rods. Both wild-  
38 type and straight rods persisted and expanded in corpus glands during chronic infection. However,  
39 the straight rods showed reduced inflammation and disease progression. Thus, helical cell shape  
40 contributes to tissue interactions that promote inflammation during chronic infection, in addition  
41 to facilitating niche acquisition during acute infection.

## 42 **Introduction**

43  
44 *Helicobacter pylori* is a Gram-negative, helical shaped bacterium that has evolved to survive in  
45 the human stomach. *H. pylori* chronically colonizes the gastric mucosa of approximately 20% of  
46 the population in developed countries and greater than 70% of the population in the developing  
47 world (1). Most *H. pylori* infections are asymptomatic; however, chronic infection increases the  
48 risk of developing chronic active gastritis, peptic ulcer disease, duodenal ulcers, gastric  
49 adenocarcinoma, and gastric extranodal marginal zone lymphoma of mucosa-associated lymphoid  
50 tissue type (MALT lymphoma) (2). The stomach is an unfavorable environment for bacteria due  
51 to its acidity, active digestive enzymes, and low partial oxygen pressure. As a neutrophile, *H.*  
52 *pylori* can only survive minutes in the stomach lumen and overcomes the acidic environment using  
53 urease, an enzyme that hydrolyzes urea to produce NH<sub>3</sub>, locally elevating the pH to near neutral.  
54 Successful colonization of the stomach by *H. pylori* requires both urease (3-6) and flagellar-  
55 mediated, chemosensory-directed motility to swim out of the lumen and through the mucus layer  
56 (7-10). Helical cell shape is thought to facilitate *H. pylori*'s ability to bore into the mucus layer in  
57 a corkscrew-like motion, further enhancing its motility through the highly viscous gastric mucus  
58 layer that overlies the gastric epithelium. Upon penetrating this thick (~300 μm) mucus layer, *H.*  
59 *pylori* preferentially colonizes a narrow band (~25 μm thick) of mucus immediately overlying the  
60 gastric epithelial cell surface (11). While *H. pylori* actively adheres to gastric epithelial cells, it  
61 remains extracellular and is only rarely observed within cells (12-14). Upon attachment, *H. pylori*  
62 disrupts the tight junctions of epithelial cells to exploit them as a site for replication, where the  
63 bacteria can grow as cell-associated microcolonies (15). *H. pylori* also penetrates gastric pits and  
64 grows in microcolonies deep in the gastric glands (8).

65  
66 The helical cell shape of *H. pylori* is generated and maintained by the peptidoglycan (PG) cell wall  
67 (16, 17). PG modifying enzymes (Csd1, Csd2, Csd3/HdpA, Csd4, and Csd6) are required to  
68 maintain helical cell shape in *H. pylori* (16-22). We and others have shown that *H. pylori* cell  
69 shape mutants ( $\Delta$ *csd1* curved rod and  $\Delta$ *csd3* variably “c”-shaped rod mutants) are attenuated in  
70 stomach colonization (16, 19). Straight rod mutants ( $\Delta$ *csd4*) also show reduced stomach  
71 colonization loads and are outcompeted by wild-type bacteria during co-infection (17). The cell  
72 shape mutants do not show a defect in their ability to infect human gastric adenocarcinoma (AGS)  
73 cells *in vitro* or to release the pro-inflammatory cytokine interleukin-8 (IL-8) (17). We previously

74 showed that variation in both cell body helical parameters (helical pitch and radius) and flagellum  
75 number among different *H. pylori* clinical isolates (LSH100, PMSS1, and B128) leads to distinct  
76 and broad swimming speed distributions that reflect both temporal variation in the swimming  
77 speed of individual bacterial cells and morphologic variation within the population (23).  
78 Furthermore, isogenic mutants with straight rod morphology ( $\Delta csd6$ ) showed reduced swimming  
79 speeds and a higher fraction of immobilized bacteria in purified gastric mucin gels (23). Whether  
80 altered motility behavior in mucus fully accounts for the altered stomach colonization potential of  
81 cell shape mutants remains an open question.

82

83 Different *H. pylori* strains preferentially colonize the corpus or antrum of the human stomach. The  
84 inner lining of the stomach consists of four layers, the serosa, muscularis, submucosa, and mucosa.  
85 The mucosa is densely packed with branched tubular gastric glands. Corpus glands are mostly  
86 comprised of chief cells, which secrete pepsin, and parietal cells, which secrete hydrochloric acid.  
87 The antrum, which comprises about one-fourth of the stomach, is lined by glands mostly  
88 containing mucus secreting cells and endocrine cells. Chronic infection with *H. pylori* triggers  
89 inflammation in the corpus or antrum, further resulting in distinct disease outcomes. Antral-  
90 predominant gastritis is associated with increased acid production, a risk factor for duodenal ulcers  
91 (24, 25). Corpus-predominant gastritis leads to loss of parietal cells and eventual reduced acid  
92 secretion, increasing the risk for gastric cancer (24, 26, 27). As in the human stomach, *H. pylori*  
93 can colonize both the corpus and antrum regions of the mouse gastric mucosa (28). The mouse  
94 stomach contains two grossly distinct stomach regions, a non-glandular (forestomach) region and  
95 a glandular region (corpus and antrum). The forestomach, which does not become colonized by *H.*  
96 *pylori*, is lined with keratinized squamous epithelium and is separated from the glandular corpus  
97 region by a raised mucosal fold referred to as the limiting ridge. Several mouse-adapted *H. pylori*  
98 isolates induce gastritis and gland atrophy in C57BL/6 mice, but do not induce neoplasia (29, 30).  
99 However, chronic infection with PMSS1, a strain shown to be more virulent than other clinical  
100 isolates in mice, triggers inflammation, gland hyperplasia, gastric atrophy, and early signs of  
101 metaplasia (31, 32).

102

103 Here, we used a mouse model of infection to investigate how helical cell shape helps *H. pylori*  
104 establish infection and acquire a replicative niche within the stomach. In addition to enumerating

105 colony forming units (CFU) of *H. pylori* in homogenized stomach tissue, we used 3D-confocal  
106 microscopy and volumetric image analysis to localize and quantify the number of bacteria present  
107 within corpus and antral glands. We discovered that  $\Delta csd6$  straight rods are attenuated at one day  
108 and one week post-infection, both in CFU load and localization within gastric glands, yet can  
109 nonetheless establish chronic infection. At one week post-infection, straight rods show reduced  
110 localization within antral glands, while at one month post-infection, localization within both antral  
111 and corpus glands is similar to or greater than that of wild-type *H. pylori*. In spite of their ability  
112 to localize within the glands,  $\Delta csd6$  straight rods elicited less inflammation and hyperplasia in the  
113 antrum and the transition zone between corpus and antrum at one and three months post-infection.  
114 Our study supports a role for helical cell shape in promoting efficient stomach colonization during  
115 acute infection and in driving gastric pathology during chronic infection.

116

## 117 **Results**

### 118 ***Csd6-dependent helical cell shape of H. pylori confers an advantage during initial colonization*** 119 ***of the stomach***

120 To investigate how helical cell morphology contributes to *H. pylori* stomach colonization and  
121 persistence, we conducted single-strain infections and competitions with wild-type *H. pylori*  
122 PMSS1 and an isogenic straight rod mutant ( $\Delta csd6$ , Table S1). We harvested a third of the stomach  
123 to assess bacterial load by colony-forming units (CFU) per gram of stomach tissue, a third to fix  
124 in paraformaldehyde for immunohistochemistry for enumeration of bacteria within gastric glands,  
125 and a third for pathological evaluation (Fig. 1). As expected, we did not recover *H. pylori* from the  
126 mock-infected groups at any time point (data not shown). The  $\Delta csd6$  straight rod mutant showed  
127 significantly attenuated gastric loads at one day with a two log difference in CFU/g of stomach  
128 tissue compared to wild-type ( $p < 0.0001$ , unpaired non-parametric two-tailed Mann Whitney *U*-  
129 test) (Fig. 2A). At one week, the mutant had a one log difference in recovery compared to wild-  
130 type ( $p < 0.0001$ ), as had been previously reported for another straight rod mutant ( $\Delta csd4$ )  
131 generated in a different *H. pylori* strain background (LSH100) (17). In a competition experiment,  
132 wild-type bacteria strongly outcompeted the  $\Delta csd6$  mutant at one week post-infection ( $p = 0.0005$ ,  
133 paired t-test) (Fig. 2B). Complementation of the  $\Delta csd6$  mutant by expressing the *csd6* gene at a  
134 distal intragenic locus (22, 33), restored helical cell shape and no significant differences in side

135 curvature distributions were observed between wild-type and the *csd6* complemented strain ( $p =$   
136 0.6, Kolmogorov-Smirnov statistics) (Fig. S1). In mice, the *csd6* complemented strain showed  
137 comparable colonization loads to the wild-type strain at one day post-infection, but interestingly  
138 was comparable to the  $\Delta csd6$  mutant at one week post-infection (Fig. 2A). However, in  
139 competitive infection, the  $\Delta csd6$  mutant was outcompeted by the *csd6* complemented strain in 6  
140 of 10 mice at one week in two independent experiments (Fig. 2B). Taken together, these data  
141 suggest that the *csd6* complemented strain has some shape-independent colonization defect that  
142 manifests after the first day of infection. Nonetheless, we tested both the deletion strain and the  
143 complemented strain in subsequent experiments.

144

145

### 146 ***3D-volumetric image analysis of H. pylori indicates an antral gland preference for both wild-*** 147 ***type and straight rod mutant bacteria during acute infection***

148 Others have shown that during experimental infection in C57BL/6 mice, *H. pylori* bacteria reside  
149 in the mucus layer that overlies the stomach epithelium and a subpopulation of bacteria penetrate  
150 deep in the gastric glands, where they can adhere to gastric epithelial cells comprising the mid-  
151 glandular proliferative zone (8, 32). We questioned whether the  $\Delta csd6$  mutant could occupy the  
152 same niches. In thin (4-5  $\mu\text{m}$ ) sections, *H. pylori* is difficult to quantify, because the gastric gland  
153 lumen is rarely captured. Thus, we followed a recently established method for 3D-confocal  
154 microscopy to visualize and quantify the number of *H. pylori* bacteria colonizing corpus and antral  
155 glands in thick (100-200  $\mu\text{m}$ ) sections using volumetric image analysis of individual bacterial cells  
156 and bacteria within microcolonies (8, 32). Similar to prior studies, the mean volume for individual  
157 cells analyzed was 9.5  $\mu\text{m}^3$  ( $n = 203$  cells analyzed) and clusters of two bacteria showed a  
158 proportional increase in volume (Fig. S2).

159

160 At one day post-infection, both wild-type and the  $\Delta csd6$  mutant were detected in corpus and antral  
161 glands at very low densities (data not shown). At one week, 3D-visualization of the antrum showed  
162 wild-type bacteria associated with gastric epithelial cells near the luminal surface, as well as deeper  
163 in the glands, where they form dense microcolonies (Fig. 3A). To explore bacterial localization  
164 differences among strains, we quantified the number of bacteria in each field of view along the

165 length of the stomach for one mouse from each genotype with similar colonization loads (Fig. 3B-  
166 D; wild-type  $7.6 \times 10^5$  CFU/g,  $\Delta csd6$   $4.0 \times 10^5$  CFU/g, *csd6* comp.  $5.4 \times 10^5$  CFU/g). Wild-type  
167 bacteria were easily detected in antral glands and the transition zone between the corpus and  
168 antrum (C/A) junction (Fig. 3B). Fewer bacteria were observed in corpus glands (<40 bacteria per  
169 field of view). The  $\Delta csd6$  mutant bacteria were detectable but at lower numbers in both corpus and  
170 antral glands (fewer bacteria per gland as well as fewer glands colonized) (Fig. 3C and S3A). Like  
171 wild-type, *csd6* complemented bacteria were observed predominantly in the antrum (Fig. 3D and  
172 S3B) and the C/A junction. We extended this analysis to additional animals from each genotype  
173 (Fig. 3E). In all animals infected with wild-type and *csd6* complemented strains, as well as two  
174 out of three animals infected with  $\Delta csd6$ , the bacteria preferentially localized to the antrum instead  
175 of the corpus. However, the levels of bacteria detected in the glands did not correlate well with  
176 CFU loads. While there was a trend toward lower levels of gland localization for  $\Delta csd6$  compared  
177 to wild-type and *csd6* complemented bacteria, the  $\Delta csd6$  mutant was able to penetrate and multiply  
178 within both corpus and antral glands in at least a subset of animals, despite exhibiting a  
179 significantly lower CFU load at this time point.

180

### 181 ***Both helical H. pylori and straight rods show expansion into the corpus after one month***

182 At one month post-infection, we observed a wide distribution of stomach loads from all strains  
183 tested, but in each case the geometric mean was around  $10^5$  CFU/g (Fig. 4A). A subset of mice  
184 showed stomach loads of  $10^6$  CFU/g or more, while other mice showed low loads near or below  
185 the limit of detection ( $10^3$  CFU/g). At three months, stomach loads from each infected group were  
186 more tightly clustered, though the geometric mean was still around  $10^5$  CFU/g (Fig. 4A). Thus,  
187 Csd6-mediated helical cell shape is necessary for robust stomach colonization during the acute  
188 stages of gastric infection in mice, but not for maintenance of chronic infection.

189

190 Given the variable stomach CFUs at one month (Fig. 4A), we determined the localization of  
191 bacteria in gastric tissue samples with either “low” ( $\sim 10^4$  CFU/g of stomach) or “high” ( $\sim 10^6$   
192 CFU/g of stomach) bacterial loads of the three strains (Fig. 4B). We observed two key differences  
193 from the one week analysis (compare to Fig. 3E): first, the total number of bacteria quantified at  
194 one month was generally lower than at one week; and second, at one month there were more  
195 bacteria in the corpus than the antrum – the reverse of what was observed at one week. For mice



196 with a “low” CFU load (Fig. 4C, left panels), the numbers of bacteria detected in corpus glands  
197 were similar among bacterial genotypes (fewer than 75 total bacteria). However, both the  $\Delta csd6$   
198 and the *csd6* complemented strains had more bacteria in the antrum (22 and 23 total bacteria,  
199 respectively) than the wild-type strain did (one bacterium). For mice with a “high” CFU load (Fig.  
200 4C, right panels), the  $\Delta csd6$  mutant was different from the other two strains, with more bacteria  
201 detected in the corpus (849) than the antrum (96). The wild-type and *csd6* complemented strains  
202 had more similar numbers of bacteria in the corpus (52 and 122, respectively) and antrum (37 and  
203 94, respectively). While we did detect more total bacteria in the “high” CFU mice than their “low”  
204 CFU counterparts, CFU load did not correlate well with the number of bacteria detected in the  
205 glands.

### 206 ***Chronic infection with the straight rod mutant results in reduced inflammation***

207 Next, we assessed pathologic responses in mice infected with the different genotypes. The most  
208 severe lesions in each animal were scored according to previously developed pathology scoring  
209 criteria for inflammation, epithelial defects, oxyntic atrophy, hyperplasia, and metaplasia in the  
210 corpus and inflammation and hyperplasia in the antrum (Table S2 and (34)). Individual scores (0-  
211 4) for each criterion were summed to generate a histological activity index (HAI) score. At one  
212 and three months post-infection, animals showed evidence of both inflammation and hyperplasia  
213 throughout the stomach. As shown in Fig. 5, which show representative images of animals with  
214 the highest HAI score for each genotype, pathologic changes were most pronounced at the  
215 corpus/antrum junction (C/A). Oxyntic atrophy (loss of parietal cells) and metaplasia were also  
216 observed within the distal corpus near the C/A junction (e.g. Fig. 5B).

217  
218 At one month post-infection, wild-type and *csd6* complemented bacteria induced inflammation  
219 characterized by lymphocytic and neutrophilic infiltrates and low level oxyntic atrophy at the  
220 antrum and C/A junction. In contrast, mice infected with the  $\Delta csd6$  mutant had little to no gastric  
221 inflammation and reduced hyperplasia (Fig. 6A and S4A-B), even though about half the mice had  
222 fairly high bacterial loads and bacteria were detected within gastric glands at this time point (Fig.  
223 4A). The differences in pathology among bacterial genotypes became more pronounced at three  
224 months (Fig. 6A and S4C-D), by which time the  $\Delta csd6$  mutant infected animals showed  
225 significantly reduced HAI scores and individual scores for inflammation, oxyntic atrophy, and

226 hyperplasia in the C/A junction (Fig. S4C-D). Animals infected with wild-type bacteria showed  
227 evidence of an inverse relationship between stomach CFU load and HAI (Spearman correlation  
228 coefficient  $r = -0.22$ , Fig. 6B), which is consistent with prior studies showing lower loads in  
229 animals with more severe gastritis (35). In contrast, animals infected with the  $\Delta csd6$  mutant  
230 showed the opposite trend (Spearman correlation coefficient  $r = 0.518$ , Fig. 6B). Thus, although  
231 bacterial loads are not statistically significantly different at three months post-infection (Fig. 4A),  
232 the  $\Delta csd6$  mutant elicits significantly less inflammation and hyperplasia compared to wild-type or  
233 the  $csd6$  complemented strain at this time point.

234

## 235 Discussion

236

237 It has long been proposed that helical cell shape facilitates *H. pylori*'s ability to penetrate the thick  
238 gastric mucus layer by enhancing cell body propulsion, thus promoting colonization of the stomach  
239 (36). Our study confirms and extends prior results that helical cell shape, while not required for  
240 stomach colonization, confers a significant advantage to *H. pylori* during acute infection (one day  
241 and one week) (16, 17). During chronic infection, the colonization levels of the wild-type strain  
242 and the  $\Delta csd6$  mutant were comparable, suggesting that the mutant can nonetheless chronically  
243 colonize glands of the stomach. Thus, straight rods may occupy a specific niche within the stomach  
244 allowing them to persist long-term. By performing 3D image analysis of *H. pylori* in thick stomach  
245 sections we found that wild-type and  $csd6$  complemented *H. pylori* had reduced localization within  
246 corpus and antral glands at one month post-infection relative to the number of bacteria observed  
247 in the glands at one week, which may be attributed to adaptive immune responses clearing the  
248 infection (35). While  $\Delta csd6$  infected tissues appeared to have somewhat lower levels of bacteria  
249 within the glands at one week, the contraction of the gland population at one month appeared less  
250 dramatic, particularly in the corpus. Our fixation conditions do not preserve the mucus layer  
251 overlying the epithelium, which may host a significant fraction of bacteria in both mutant and wild-  
252 type infections. Finally, we found that the  $\Delta csd6$  mutant elicited less inflammation than wild-type  
253 or complemented bacteria at one and three months post-infection, despite having comparable  
254 bacterial CFU loads and similar or greater localization within the gastric glands. Thus, our study  
255 is the first to suggest a bacterial load-independent link between *H. pylori*'s helical cell shape and  
256 chronic gastritis.



257

258 During chronic infection with *H. pylori*, the degree of inflammation found at the corpus/antrum  
259 junction is often greater than observed in the adjacent mucosa of either the corpus or antrum, and  
260 may promote glandular atrophy, loss of parietal cells in the corpus, and eventually mucous cell  
261 gland hyperplasia (37). In the present study, we found highly variable colonization loads in mice  
262 infected with either wild-type, the  $\Delta csd6$  mutant, or the *csd6* complemented strain for one month,  
263 which may be related to differential host responses among mice. Chronic infection with wild-type  
264 PMSS1 or the *csd6* complemented strain induced pathology in the antrum and the C/A junction.  
265 However, straight rods elicited less inflammation and gland hyperplasia. Chronic infection with  
266 *H. pylori* is controlled by innate and adaptive immune responses, regulated by CD4<sup>+</sup> T-helper 1  
267 (Th1), Th17-polarized T-effector cell subsets, B-cells, and their secreted cytokines (35, 38).  
268 Evaluating the adaptive immune response to infection with the  $\Delta csd6$  mutant will determine if its  
269 differential localization in corpus glands at one month influenced its ability to induce inflammation  
270 or cause gastric disease. In addition, some *H. pylori* strains, including PMSS1 used in this study,  
271 express VacA, a virulence factor that has been shown to suppress T-cell responses to mediate  
272 longevity of infection (39-41). It will also be important to determine whether *H. pylori* cell shape  
273 mutants have unexpected effects on the expression of other factors that could mediate or suppress  
274 inflammation, such as VacA, to maintain a favorable niche in the stomach.

275

276 Our work demonstrates that the helical cell shape of *H. pylori* is important for acute colonization  
277 of the stomach and enhances pathology during chronic infection. Helical cell shape is also  
278 important for a bacterial pathogen that colonizes the human intestinal tract, *Campylobacter jejuni*.  
279 Isogenic straight rod mutants of *C. jejuni* *pgp1* and *pgp2* (homologs of *H. pylori* *csd4* and *csd6*,  
280 respectively) show attenuated motility in soft agar (42, 43) similar to *H. pylori*. However, *C. jejuni*  
281 *pgp1* and *pgp2* mutants completely fail to colonize intestinal crypts or to induce inflammatory  
282 responses in the mouse model tested (44).

283

284 In summary, our study provides insight into how helical cell shape impacts *H. pylori*'s niche  
285 acquisition and inflammation in the stomach. Loss of helical cell shape alters *H. pylori*'s ability to  
286 utilize some of the available niches within the stomach and its ability to promote inflammation and  
287 tissue hyperplasia when present in the glands. As morphological diversity exists between different

288 clinical isolates of *H. pylori* in cell body and helical cell parameters (23), *H. pylori* clinical isolates  
289 with decreased helical pitch and twist may differ in their ability to colonize certain gastric niches  
290 and in the trajectories of pathogenesis. Thus, diversity in cell shape parameters may contribute to  
291 the diversity of pathogenic outcomes observed in infected individuals.

292

## 293 **Materials and Methods**

294

295 ***H. pylori* strains and growth conditions.** Strains used in this study are described in Table S1.  
296 Briefly, wild-type *H. pylori* strain PMSS1, also called 10700 (31, 45), and derivatives were  
297 cultured on horse blood plates or in liquid media containing 90% (v/v) Brucella broth (BD  
298 Biosciences) and 10% fetal bovine serum (GIBCO) (BB10) in the absence of antimicrobials, as  
299 previously described (16). Cells were maintained at 37°C under microaerobic conditions in a tri-  
300 gas incubator equilibrated to 10% CO<sub>2</sub> and 10% O<sub>2</sub>. Plates were incubated 24-72 hours and liquid  
301 cultures were incubated for 12-16 hours under constant agitation at 200 rpm. For resistance marker  
302 selection, horse blood plates were supplemented with chloramphenicol (15 µg/mL) or kanamycin  
303 (25 µg/mL).

304

305 ***Strain construction.*** Isogenic mutant of *csd6* (HPG27\_477) in the PMSS1 strain background was  
306 generated by transfer of the mutation constructed in the G27/LSH100 strain background (16, 22)  
307 using natural transformation (46). Transformants were confirmed by PCR using primers  
308 homologous to upstream and downstream flanking regions of the gene using the primers listed in  
309 Table S2. The mutation was then backcrossed into PMSS1 once by isolating genomic DNA from  
310 the resulting strain for natural transformation of PMSS1. The resulting backcrossed clones were  
311 evaluated by PCR to confirm replacement of the wild-type allele with the null allele. Clones were  
312 checked for urease activity and motility, and single clones were used for quantitative morphology  
313 analysis and for oral gavage of mice.

314

315 The *csd6* complemented strain was constructed by natural transformation of PMSS1  $\Delta csd6$  with  
316 genomic DNA from a *csd6* complemented strain generated in the *H. pylori* G27 strain background,  
317 TSH31 ( $\Delta csd6::cat$  McGee:*csd6:aphA3*), where a wild-type copy of *csd6* (HPG27\_477) was  
318 introduced at a neutral intergenic chromosomal locus (33). Genomic DNA from TSH31 was used

319 for natural transformation of the PMSS1  $\Delta csd6$  strain. Transformants were selected on horse blood  
320 plates supplemented with kanamycin (25  $\mu\text{g}/\text{mL}$ ). The recipient strain (EPH1) was PCR confirmed  
321 using primers homologous to upstream and downstream flanking regions using the primers listed  
322 in Table S1. The *csd6* complemented strain was then backcrossed once by isolating genomic DNA  
323 from EPH1 for natural transformation of PMSS1  $\Delta csd6$ . The resulting backcrossed clones were  
324 evaluated by PCR to confirm integration of *csd6* and were renamed LMH12 clones 1-3. The clones  
325 were then checked for urease activity and motility, and were used for quantitative morphology  
326 analysis. Figure S1 shows morphology analysis of LMH12 clone 3 (*csd6* complemented strain),  
327 which was the strain used for single-strain infections in mice and for bacterial localization studies.  
328

329 **Morphology analysis.** Wild-type *H. pylori* PMSS1,  $\Delta csd6$ , and *csd6* complemented bacteria were  
330 grown in liquid culture to an optical density at 600 nm (O.D.<sub>(600)</sub>) of 0.4 - 0.6. Bacteria was fixed  
331 in 4% Paraformaldehyde with 25% Glycerol in 1X PBS and added to 0.1% Poly-L-lysine (Sigma  
332 Aldrich) coated coverslips, which were then placed on a pre-cleaned microscope slide and sealed  
333 with VaLP (1:1:1 Vaseline: Lanolin: Paraffin). Single focal plane images were collected using a  
334 100X ELWD Plan APO (NA 1.40 oil) objective mounted on a Nikon TE 200 microscope, equipped  
335 with a Nikon CoolSNAP HQ CCD camera controlled by MetaMorph software (MDS Analytical  
336 Technologies). Quantitative morphology analysis of manually thresholded phase-contrast images  
337 was performed as described in Sycuro *et al.* 2010 using the CellTool software program (16, 47).  
338

339 **Parameter optimization for *H. pylori* 3D-image analysis.** Wild-type *H. pylori* PMSS1 bacteria  
340 was grown in liquid culture to an optical density at 600 nm (O.D.<sub>(600)</sub>) of 0.4 - 0.6. A 1 mL of  
341 bacterial culture was harvested in a 1.5 mL microcentrifuge tube and centrifuged at 5,000 rpm for  
342 5 min. The cell pellet was resuspended in 100-200  $\mu\text{L}$  of 4% Paraformaldehyde (PFA) in 100 mM  
343 phosphate buffer (pH 7.4) and fixed for at least 30 min at room temperature. Bacteria were then  
344 embedded in 4% agarose (ultra-pure low-melting point agarose, Invitrogen) prepared in 1X  
345 phosphate-buffered saline (pH 7.4) (Gibco). The agarose solution was first cooled down to  $\sim 55$  -  
346  $65^\circ\text{C}$  and then aliquoted into 1.5 mL microcentrifuge tubes. Aliquots of fixed bacteria were  
347 immediately added and gently resuspended into the solution before it solidified. The solidified  
348 slabs were gently removed by insertion of a metal spatula on the side of the tube. The slabs were  
349 then sectioned using a vibratome (Leica VT 1200 S fully automated vibrating blade microtome,

350 Leica Biosystems, Germany) to generate 100 - 200  $\mu\text{m}$  thick sections. Sections were permeabilized  
351 in blocking buffer (3% bovine serum albumin (Sigma Aldrich); 1% Saponin (Sigma Aldrich); and  
352 1% Triton X-100 (Sigma Aldrich) in 1X PBS) and immunostained with primary anti-*H. pylori*  
353 rabbit polyclonal antibody (1:1,000 dilution) (gifted by Dr. Manuel Amieva at Stanford  
354 University) overnight at 4°C. A goat anti-rabbit Alexa Fluor-488 conjugate antibody (1:2,000)  
355 (Molecular Probes) was used to visualize *H. pylori*. Samples were incubated in the secondary  
356 antibody for 2 hrs at room temperature. Sections were then washed 5X with blocking buffer and  
357 then mounted onto standard glass microscope slides with secure imaging spacers (9 mm diameter  
358 x 0.12 mm depth, Electron Microscopy Sciences). Pro-Long Diamond Antifade medium was  
359 added (Molecular Probes) before mounting on coverslips.

360

361 **Ethics statement.** All procedures involving animals were done under practices and procedures of  
362 Animal Biosafety Level 2 and carried out with strict accordance with the recommendations in the  
363 Guide for the Care and Use of Laboratory Animals of the National Institutes of Health. The facility  
364 is fully accredited by the Association for Assessment and Accreditation of Laboratory Animal  
365 Care and complies with the United States Department of Agriculture, Public Health Service,  
366 Washington State, and local area animal welfare regulations. All activities were approved by the  
367 FHCRC Institutional Animal Care and Use Committee (IACUC; protocol number 1531). Animals  
368 were euthanized by CO<sub>2</sub> asphyxiation followed by cervical dislocation.

369

370 **Mouse infections.** 4-6 week old female C57BL/6J mice were purchased from the Jackson  
371 Laboratory (Bar Harbor, Maine, U.S.) and were certified free of endogenous *Helicobacter*  
372 infection by the vendor. All animals were maintained in autoclaved microisolator cages (1-5 mice  
373 per cage) and provided with standard chow and water ad libitum. Mice were infected with a single  
374 dose of  $5 \times 10^7$  *H. pylori* cells/strain (0.1 mL) via oral gavage. Mock-infected controls were  
375 gavaged with 0.1 mL of liquid culture media containing 90% (v/v) Brucella broth and 10% fetal  
376 bovine serum (BB10); no *H. pylori* were recovered from mock-infected mice. Mice were  
377 euthanized by inhalation of CO<sub>2</sub> and stomachs were harvested at one day, one week, and one or  
378 three months post-infection. Most of the non-glandular region (forestomach) was discarded since  
379 this region of the stomach is lined with squamous rather than glandular epithelium. *H. pylori* has  
380 not been shown to colonize this region of the stomach. However, *H. pylori* may colonize the

381 interface between the squamous forestomach and glandular stomach where the corpus begins (the  
382 squamocolumnar junction). Regions of interest for *H. pylori* colonization include the corpus,  
383 antrum, and the pyloric junction with the duodenum. Therefore, part of the forestomach was  
384 maintained and the glandular stomach (corpus and antrum) was opened along the lesser curvature  
385 from the esophagus through the proximal duodenum. For one day and one week harvests, half the  
386 stomach was used for plating for CFU enumeration and the other half was fixed in 4%  
387 paraformaldehyde (PFA) in 100 mM phosphate buffer (pH 7.4) for 1-2 hours. For chronic infection  
388 time points (one and three months), the stomach was divided into thirds. A third of the stomach  
389 was collected to measure CFU/gram of stomach load, a third was fixed in 4% PFA for  
390 immunofluorescence, and a third was fixed in 10% neutral buffered formalin (NBF) solution  
391 (Thermo Fisher Scientific) for histology. In each case, food was carefully removed and the  
392 stomach was laid flat on an index card and placed in a cassette with a sponge at top, closed, and  
393 fixed in its respective solution. For CFU counts, one-half or one-third stomachs were manually  
394 homogenized using a pestle in 0.5 mL of BB10. Serial 10-fold dilutions of stomach homogenate  
395 were plated on solid horse blood agar plates containing 4% Columbia agar base (Oxoid,  
396 Hampshire, UK), 5% defibrinated horse blood (HemoStat Labs, Dixon, CA) 0.2%  $\beta$ -cyclodextrin  
397 (Sigma, St. Louis, MO), 10  $\mu$ g/mL vancomycin (Sigma), 5  $\mu$ g/mL cefsulodin (Sigma), 2.5 U/mL  
398 polymyxin B (Sigma), 5  $\mu$ g/mL trimethoprim (Sigma), 8  $\mu$ g/mL amphotericin B (Sigma), and  
399 bacitracin (200  $\mu$ g/mL) to eliminate normal mouse microbiota growth. Plates were incubated at  
400 37°C using a tri-gas incubator (10% CO<sub>2</sub>, 10% O<sub>2</sub>; Thermo Fisher Scientific) for 4-5 days.

401  
402 **Competition experiments.** Mice were infected with a 1:1 ratio of 10<sup>7</sup> CFU or wild-type *H. pylori*  
403 and the isogenic straight rod mutant ( $\Delta$ *csd6*) or the *csd6* complemented strain. After one week,  
404 stomachs were removed, divided in half, and plated to determine bacterial loads as CFU/gram of  
405 stomach. Wild-type bacterial output was plated on horse blood plates containing the antibiotics  
406 described above. The  $\Delta$ *csd6* mutant was selected on horse blood plates with chloramphenicol (15  
407  $\mu$ g/mL), and the *csd6* complemented strain was selected on horse blood plates with kanamycin (25  
408  $\mu$ g/mL).

409  
410 **Immunofluorescence of thick longitudinal mouse stomach sections.** Tissues from mouse  
411 stomachs were processed for confocal immunofluorescence microscopy as described in (8, 32),

412 with minor modifications. Gastric tissue was fixed in 4% PFA for 1-2 hours at room temperature.  
413 Tissue was embedded in 4% agarose in 1X phosphate-buffered saline (PBS) (pH 7.4) (Gibco) and  
414 sectioned using a vibratome to generate 100 – 200  $\mu\text{m}$  thick longitudinal sections that include the  
415 limiting ridge at the forestomach/glandular junction to the pyloric junction with the duodenum.  
416 Tissue sections were then permeabilized in blocking buffer (3% bovine serum albumin (Sigma  
417 Aldrich); 1% Saponin (Sigma Aldrich); 1% Triton X-100 (Sigma Aldrich)) in 1X PBS (pH 7.4)  
418 (Gibco). Anti-*H. pylori* rabbit polyclonal antibody (1:1,000 dilution) was used to immunostain *H.*  
419 *pylori* in the tissue overnight at 4°C. The sections were then washed 5X with blocking buffer and  
420 incubated with a goat anti-rabbit Alexa Fluor-647 conjugate antibody (1:2,000) to visualize  
421 bacteria in tissue (Molecular Probes), and 4', 6-Diamidino-2-phenylindole (DAPI) (0.1  $\mu\text{g}/\text{mL}$ ) to  
422 stain nuclei for 2 hrs at room temperature. The sections were then washed 5X with blocking buffer  
423 and mounted onto standard glass microscope slides with secure imaging spacers (20 mm diameter  
424 x 0.12 mm thick, Electron Microscopy Sciences) or hand-made imaging spacers using parafilm  
425 (0.12 mm thick). Pro-Long Diamond Antifade medium (Molecular Probes) was added before  
426 mounting on coverslips.

427  
428 **Confocal microscopy.** Tissue samples were imaged with a Zeiss LSM 780 NLO confocal and  
429 multi-photon microscope with a 40 X oil immersion objective lens (EC Plan-Neofluar 40 X/1.30  
430 oil) and Z-stacks (355  $\mu\text{m}$  (w) x 355  $\mu\text{m}$  (h)) were generated using the ZEN acquisition software  
431 program. Images were acquired at a frame size of 1,024 x 1,024 with 8-bit depth and at a frame  
432 rate speed of 8 frames per second. Z-stacks were generated with a slice interval of 0.5  $\mu\text{m}$  and  
433 penetrated 40-50  $\mu\text{m}$  into the section. For each tissue section, multiple Z-stacks (ranging from 25-  
434 30) were acquired to capture the full length of longitudinal sections that include the limiting ridge  
435 of the forestomach to the glandular junction to the pyloric junction with the duodenum. For all Z-  
436 stacks, a collection of non-overlapping images was acquired by manual translation of the  
437 microscope stage.

438  
439 **Volumetric image analysis and quantitation of *H. pylori* in the stomach.** Quantitation of *H. pylori*  
440 within individual gastric glands was performed using the Volocity 3D-image analysis software  
441 program, as described in (8, 32), with minor modifications. 3D-reconstructed images were  
442 imported onto Volocity and the total volume ( $\mu\text{m}^3$ ) for individual bacterial cells was determined.



443 The mean volume for a bacterium ( $9.5 \mu\text{m}^3$ ) was used to calculate the total number of bacteria near  
444 or at the surface epithelium and within gastric glands. The same measurement protocol was applied  
445 across all tissue samples analyzed for wild-type *H. pylori*, the  $\Delta\text{csd6}$  mutant, and for *csd6*  
446 complemented bacteria. Analysis of 3 sections ( $>500 \mu\text{m}$  apart) provided consistent results in  
447 bacterial number counts. Our bacterial localization studies included analysis of 1-3 sections per  
448 infected mouse. Three sections were analyzed per mouse after one week post-infection and 2-3  
449 sections were examined per mouse at one month post-infection.

450

451 ***Histologic evaluation of H. pylori infected stomachs.*** Longitudinal gastric strips from the lesser  
452 curvature that include the squamocolumnar junction through the proximal duodenum were fixed  
453 in 10% NBF. Samples were paraffin embedded, sectioned ( $5 \mu\text{m}$  thick), and stained with  
454 Hematoxylin and Eosin (H&E) by the Experimental Histopathology Core at the Fred Hutchinson  
455 Cancer Research Center. Slides were interpreted and scored using the scoring criteria adapted from  
456 (34), shown in Table S2, by a veterinary pathologist (S.E.K.) who was blinded to the experimental  
457 details. The individual lesion scores of every mouse in each group were evaluated and compared  
458 for inflammation, epithelial defects, oxyntic atrophy, hyperplasia, and metaplasia in the corpus  
459 and inflammation and hyperplasia in the antrum. Individual scores (0-4) for each criterion were  
460 summed to generate a histological activity index (HAI) score. 9-11 samples per group (mock-  
461 infected, wild-type,  $\Delta\text{csd6}$ , and *csd6* complemented strain) were evaluated at one and three months  
462 post-infection.

463

464 ***Statistical analyses.*** We used the Kolmogorov-Smirnov (K-S) statistics tool in CellTool to assay  
465 the differences in cell shape morphology, including cell length and side curvature distributions, as  
466 described in (16, 17). For CFU data and histopathology scores, comparisons of three groups were  
467 performed using a Kruskal–Wallis one-way analysis of variance (ANOVA) followed by Dunn’s  
468 multiple test corrections, and pairwise comparisons (competition experiments) were performed  
469 with the Mann-Whitney U test using GraphPad Prism 7 (GraphPad Software, La Jolla, CA USA).  
470  $P < 0.05$  was considered statistically significant. For the histological activity index (HAI), because  
471 mucous metaplasia and hyalinosis may develop spontaneously in mice, these sub-scores were  
472 excluded from the calculation of the total HAI.

473

474 **Acknowledgments.** We thank Dr. Manuel Amieva for the wild-type *H. pylori* PMSS1 strain and  
475 antibodies, Dr. Julie Huang for advice in preparing gastric tissue for 3-D confocal microscopy, and  
476 Simran Handa (supported by a generous donation from the AT&T Foundation to the FHCRC  
477 Summer High School Internship Program) and Ericka Pegues for assistance in generating the *csd6*  
478 complemented strain. This work was supported by the US National Institute of Health Grant R01  
479 AI136946 to N.R.S., NIH Ruth L. Kirschstein National Research Service Award (NRSA) F31  
480 AI098424 from the NIAID to L.E.M. This research was supported by the Comparative Medicine,  
481 Electron Microscopy, Experimental Histopathology and Scientific Imaging Shared Resource of  
482 the Fred Hutch/University of Washington Cancer Consortium (P30 CA015704). The content of  
483 this article is solely the responsibility of the authors and does not necessarily represent the official  
484 views of the National Cancer Institute and the National Institute of Allergy and Infectious  
485 Diseases.

486

487 **Author contributions.** L.E.M and N.R.S. designed the study. L.E.M V.P.O and C.K.L. performed  
488 experiments. L.E.M., V.P.O., C.K.L., and N.R.S. performed data analysis and interpretation.  
489 S.E.K. evaluated samples for pathology. L.E.M, V.P.O, S.E.K., and N.R.S. wrote the manuscript.

490

491 **Additional information.** Supplementary information is available for this paper. Correspondence  
492 and requests for materials should be addressed to N.R.S.

493

494 **Competing financial interests.** The authors declare no competing financial interests.

495

496

497

498

499 **Table 1.** Bacterial strains used in this study.  
500

| <b>Strain Name</b> | <b>Genotype or Description</b>                                                       | <b>Shape phenotype</b>            | <b>Reference or Source</b> |
|--------------------|--------------------------------------------------------------------------------------|-----------------------------------|----------------------------|
| PMSS1              | Wild-type <i>H. pylori</i>                                                           | helical                           | (31, 45)                   |
| LMH6               | $\Delta csd6::cat$ in PMSS1                                                          | straight                          | This study                 |
| TSH17              | $\Delta csd6::cat$ in LSH100                                                         | straight                          | (22)                       |
| TSH31              | $\Delta csd6::cat$ <i>McGee:csd6:aphA3</i> in LSH100                                 | helical and straight morphologies | (22)                       |
| EPH1               | <i>csd6</i> complemented strain: $\Delta csd6::cat$ <i>McGee:csd6:aphA3</i> in PMSS1 | helical                           | This study                 |
| LMH12              | <i>csd6</i> complemented strain: EPH1 backcrossed in PMSS1                           | helical                           | This study                 |

501  
502  
503  
504  
505  
506  
507  
508  
509  
510  
511  
512  
513  
514  
515  
516

517  
518  
519  
520  
521  
522  
523

## Supporting Tables

**Table S1.** Primers used in this study.

| Gene name                                     | <i>H. pylori</i> gene annotation                                      | Primer                 | Sequence                                    |
|-----------------------------------------------|-----------------------------------------------------------------------|------------------------|---------------------------------------------|
| <i>Targeted disruption primers</i>            |                                                                       |                        |                                             |
| <i>csd6</i>                                   | HPG27_477 <sup>a</sup><br>(HP0518) <sup>b</sup>                       | HPG27_476<br>Forward   | gcgcgctctagAAGGAAGAAAAGAGCTTGC <sup>c</sup> |
|                                               |                                                                       | HPG27_478<br>Reverse   | GCTGGTAGGCTTTGTAATC                         |
| <i>Complementation primers</i>                |                                                                       |                        |                                             |
| <i>csd6</i> at<br>McGee<br>locus <sup>d</sup> | $\Delta csd6::cat$<br><i>McGee:csd6</i><br>: <i>aphA3</i> in<br>PMSS1 | McGee locus<br>Forward | GAGCGAGAATTCAAAGACAACCCCA                   |
|                                               |                                                                       | McGee locus<br>Reverse | GGCGATGGGGCTGGGGCGTGCGTGATAGGC              |

524  
525  
526  
527  
528  
529  
530  
531  
532  
533  
534  
535  
536  
537  
538  
539  
540  
541  
542  
543

<sup>a</sup>Gene annotation in the human clinical isolate G27 (48).

<sup>b</sup>Gene annotation in the human clinical isolate 26695 (49).

<sup>c</sup>Gene specific sequences are in uppercase and sequences added for cloning are in lower case.

<sup>d</sup>McGee Locus: intergenic sequence located between HPG27\_186 and HPG27\_187 (*H. pylori* strain G27) (48).

544 **Table S2.** Histopathologic scoring for inflammation and hyperplasia in mice chronically infected  
 545 with *H. pylori* for one and three months.  
 546  
 547  
 548

| Score    | Inflammation                                         | Hyperplasia                                                 | Epithelial defects                     | Oxyntic atrophy                                       | Metaplasia                                               |
|----------|------------------------------------------------------|-------------------------------------------------------------|----------------------------------------|-------------------------------------------------------|----------------------------------------------------------|
| <b>0</b> | No inflammation                                      | No hyperplasia                                              | No epithelial defects                  | No oxyntic atrophy                                    | No metaplasia                                            |
| <b>1</b> | Mild patchy or multifocal islands                    | Mild elongation of mucosa                                   | Tattered epithelial surface            | Decreased chief cells; parietal cells intact          | < 50% replacement of oxyntic mucosa by antralized glands |
| <b>2</b> | Moderate coalescing infiltrate                       | Increased surface epithelium 2X normal length               | Attenuated epithelial surface          | Few or no chief cells; parietal cells intact          | >50% replacement of oxyntic mucosa by antralized glands  |
| <b>3</b> | Moderate to severe sheets in mucosa and/or submucosa | Increased surface epithelium 3X normal length               | Inapparent surface epithelium          | No remaining chief cells; loss of parietal cells      | Near complete replacement of glands by antralized mucosa |
| <b>4</b> | Severe florid inflammation into muscularis           | Increased surface epithelium 4X normal length +/- dysplasia | Mucosal erosions of surface epithelium | No chief cells and few or no parietal cells remaining | Total replacement of glands by antralized mucosa         |

549  
 550

551  
552  
553  
554  
555  
556  
557  
558  
559  
560  
561  
562  
563  
564  
565  
566  
567  
568  
569  
570  
571  
572  
573  
574  
575  
576  
577  
578  
579  
580  
581  
582  
583  
584  
585  
586  
587  
588  
589  
590  
591  
592  
593  
594  
595  
596

## References

1. Hooi JKY, Lai WY, Ng WK, Suen MMY, Underwood FE, Tanyingoh D, Malfertheiner P, Graham DY, Wong VWS, Wu JCY, Chan FKL, Sung JY, Kaplan GG, Ng SC. 2017. Global Prevalence of *Helicobacter pylori* Infection: Systematic Review and Meta-Analysis. *Gastroenterology* 153:420-429.
2. Cover TL, Blaser MJ. 2009. *Helicobacter pylori* in health and disease. *Gastroenterology* 136:1863-73.
3. Eaton KA, Brooks CL, Morgan DR, Krakowka S. 1991. Essential role of urease in pathogenesis of gastritis induced by *Helicobacter pylori* in gnotobiotic piglets. *Infect Immun* 59:2470-5.
4. Nakamura H, Yoshiyama H, Takeuchi H, Mizote T, Okita K, Nakazawa T. 1998. Urease plays an important role in the chemotactic motility of *Helicobacter pylori* in a viscous environment. *Infect Immun* 66:4832-7.
5. Tsuda M, Karita M, Mizote T, Morshed MG, Okita K, Nakazawa T. 1994. Essential role of *Helicobacter pylori* urease in gastric colonization: definite proof using a urease-negative mutant constructed by gene replacement. *Eur J Gastroenterol Hepatol* 6 Suppl 1:S49-52.
6. Tsuda M, Karita M, Morshed MG, Okita K, Nakazawa T. 1994. A urease-negative mutant of *Helicobacter pylori* constructed by allelic exchange mutagenesis lacks the ability to colonize the nude mouse stomach. *Infect Immun* 62:3586-9.
7. Eaton KA, Suerbaum S, Josenhans C, Krakowka S. 1996. Colonization of gnotobiotic piglets by *Helicobacter pylori* deficient in two flagellin genes. *Infect Immun* 64:2445-8.
8. Howitt MR, Lee JY, Lertsethtakarn P, Vogelmann R, Joubert LM, Ottemann KM, Amieva MR. 2011. ChePep controls *Helicobacter pylori* infection of the gastric glands and chemotaxis in the Epsilonproteobacteria. *MBio* 2.
9. Rolig AS, Shanks J, Carter JE, Ottemann KM. 2012. *Helicobacter pylori* requires TlpD-driven chemotaxis to proliferate in the antrum. *Infect Immun* 80:3713-20.
10. Terry K, Williams SM, Connolly L, Ottemann KM. 2005. Chemotaxis plays multiple roles during *Helicobacter pylori* animal infection. *Infect Immun* 73:803-11.
11. Schreiber S, Konradt M, Groll C, Scheid P, Hanauer G, Werling HO, Josenhans C, Suerbaum S. 2004. The spatial orientation of *Helicobacter pylori* in the gastric mucus. *Proc Natl Acad Sci U S A* 101:5024-9.
12. Amieva MR, Salama NR, Tompkins LS, Falkow S. 2002. *Helicobacter pylori* enter and survive within multivesicular vacuoles of epithelial cells. *Cell Microbiol* 4:677-90.
13. Chu YT, Wang YH, Wu JJ, Lei HY. 2010. Invasion and multiplication of *Helicobacter pylori* in gastric epithelial cells and implications for antibiotic resistance. *Infect Immun* 78:4157-65.
14. Kwok T, Backert S, Schwarz H, Berger J, Meyer TF. 2002. Specific entry of *Helicobacter pylori* into cultured gastric epithelial cells via a zipper-like mechanism. *Infect Immun* 70:2108-20.
15. Tan S, Tompkins LS, Amieva MR. 2009. *Helicobacter pylori* usurps cell polarity to turn the cell surface into a replicative niche. *PLoS Pathog* 5:e1000407.
16. Sycuro LK, Pincus Z, Gutierrez KD, Biboy J, Stern CA, Vollmer W, Salama NR. 2010. Peptidoglycan crosslinking relaxation promotes *Helicobacter pylori*'s helical shape and stomach colonization. *Cell* 141:822-33.



- 597 17. Sycuro LK, Wyckoff TJ, Biboy J, Born P, Pincus Z, Vollmer W, Salama NR. 2012.  
598 Multiple peptidoglycan modification networks modulate *Helicobacter pylori*'s cell shape,  
599 motility, and colonization potential. *PLoS Pathog* 8:e1002603.
- 600 18. An DR, Kim HS, Kim J, Im HN, Yoon HJ, Yoon JY, Jang JY, Heseck D, Lee M,  
601 Mobashery S, Kim SJ, Lee BI, Suh SW. 2015. Structure of Csd3 from *Helicobacter*  
602 *pylori*, a cell shape-determining metallopeptidase. *Acta Crystallogr D Biol Crystallogr*  
603 71:675-86.
- 604 19. Bonis M, Ecobichon C, Guadagnini S, Prevost MC, Boneca IG. 2010. A M23B family  
605 metallopeptidase of *Helicobacter pylori* required for cell shape, pole formation and  
606 virulence. *Mol Microbiol* 78:809-19.
- 607 20. Kim HS, Im HN, An DR, Yoon JY, Jang JY, Mobashery S, Heseck D, Lee M, Yoo J, Cui  
608 M, Choi S, Kim C, Lee NK, Kim SJ, Kim JY, Bang G, Han BW, Lee BI, Yoon HJ, Suh  
609 SW. 2015. The Cell Shape-determining Csd6 Protein from *Helicobacter pylori*  
610 Constitutes a New Family of L,D-Carboxypeptidase. *J Biol Chem* 290:25103-17.
- 611 21. Kim HS, Kim J, Im HN, An DR, Lee M, Heseck D, Mobashery S, Kim JY, Cho K, Yoon  
612 HJ, Han BW, Lee BI, Suh SW. 2014. Structural basis for the recognition of  
613 muramyltripeptide by *Helicobacter pylori* Csd4, a D,L-carboxypeptidase controlling the  
614 helical cell shape. *Acta Crystallogr D Biol Crystallogr* 70:2800-12.
- 615 22. Sycuro LK, Rule CS, Petersen TW, Wyckoff TJ, Sessler T, Nagarkar DB, Khalid F,  
616 Pincus Z, Biboy J, Vollmer W, Salama NR. 2013. Flow cytometry-based enrichment for  
617 cell shape mutants identifies multiple genes that influence *Helicobacter pylori*  
618 morphology. *Mol Microbiol* 90:869-83.
- 619 23. Martinez LE, Hardcastle JM, Wang J, Pincus Z, Tsang J, Hoover TR, Bansil R, Salama  
620 NR. 2016. *Helicobacter pylori* strains vary cell shape and flagellum number to maintain  
621 robust motility in viscous environments. *Mol Microbiol* 99:88-110.
- 622 24. Atherton JC. 2006. The pathogenesis of *Helicobacter pylori*-induced gastro-duodenal  
623 diseases. *Annu Rev Pathol* 1:63-96.
- 624 25. Wroblewski LE, Peek RM, Jr. 2013. *Helicobacter pylori* in gastric carcinogenesis:  
625 mechanisms. *Gastroenterol Clin North Am* 42:285-98.
- 626 26. Blaser MJ, Atherton JC. 2004. *Helicobacter pylori* persistence: biology and disease. *J*  
627 *Clin Invest* 113:321-33.
- 628 27. Uemura N, Okamoto S, Yamamoto S, Matsumura N, Yamaguchi S, Yamakido M,  
629 Taniyama K, Sasaki N, Schlemper RJ. 2001. *Helicobacter pylori* infection and the  
630 development of gastric cancer. *N Engl J Med* 345:784-9.
- 631 28. Akada JK, Ogura K, Dailidienė D, Dailide G, Cheverud JM, Berg DE. 2003.  
632 *Helicobacter pylori* tissue tropism: mouse-colonizing strains can target different gastric  
633 niches. *Microbiology* 149:1901-9.
- 634 29. Ferrero RL, Thiberge JM, Huerre M, Labigne A. 1998. Immune responses of specific-  
635 pathogen-free mice to chronic *Helicobacter pylori* (strain SS1) infection. *Infect Immun*  
636 66:1349-55.
- 637 30. Sakagami T, Dixon M, O'Rourke J, Howlett R, Alderuccio F, Vella J, Shimoyama T, Lee  
638 A. 1996. Atrophic gastric changes in both *Helicobacter felis* and *Helicobacter pylori*  
639 infected mice are host dependent and separate from antral gastritis. *Gut* 39:639-48.
- 640 31. Arnold IC, Lee JY, Amieva MR, Roers A, Flavell RA, Sparwasser T, Muller A. 2011.  
641 Tolerance rather than immunity protects from *Helicobacter pylori*-induced gastric  
642 preneoplasia. *Gastroenterology* 140:199-209.

- 643 32. Sigal M, Rothenberg ME, Logan CY, Lee JY, Honaker RW, Cooper RL, Passarelli B,  
644 Camorlinga M, Bouley DM, Alvarez G, Nusse R, Torres J, Amieva MR. 2015.  
645 *Helicobacter pylori* Activates and Expands Lgr5(+) Stem Cells Through Direct  
646 Colonization of the Gastric Glands. *Gastroenterology* 148:1392-404 e21.
- 647 33. Langford ML, Zabaleta J, Ochoa AC, Testerman TL, McGee DJ. 2006. In vitro and in  
648 vivo complementation of the *Helicobacter pylori* arginase mutant using an intergenic  
649 chromosomal site. *Helicobacter* 11:477-93.
- 650 34. Rogers AB. 2012. Histologic scoring of gastritis and gastric cancer in mouse models.  
651 *Methods Mol Biol* 921:189-203.
- 652 35. Sayi A, Kohler E, Hitzler I, Arnold I, Schwendener R, Rehrauer H, Muller A. 2009. The  
653 CD4+ T cell-mediated IFN-gamma response to *Helicobacter* infection is essential for  
654 clearance and determines gastric cancer risk. *J Immunol* 182:7085-101.
- 655 36. Montecucco C, Rappuoli R. 2001. Living dangerously: how *Helicobacter pylori* survives  
656 in the human stomach. *Nat Rev Mol Cell Biol* 2:457-66.
- 657 37. Goldenring JR, Nomura S. 2006. Differentiation of the gastric mucosa III. Animal  
658 models of oxyntic atrophy and metaplasia. *Am J Physiol Gastrointest Liver Physiol*  
659 291:G999-1004.
- 660 38. Velin D, Favre L, Bernasconi E, Bachmann D, Pythoud C, Saiji E, Bouzourene H,  
661 Michetti P. 2009. Interleukin-17 is a critical mediator of vaccine-induced reduction of  
662 *Helicobacter* infection in the mouse model. *Gastroenterology* 136:2237-2246 e1.
- 663 39. Boncristiano M, Paccani SR, Barone S, Ulivieri C, Patrussi L, Ilver D, Amedei A,  
664 D'Elia MM, Telford JL, Baldari CT. 2003. The *Helicobacter pylori* vacuolating toxin  
665 inhibits T cell activation by two independent mechanisms. *J Exp Med* 198:1887-97.
- 666 40. Gebert B, Fischer W, Weiss E, Hoffmann R, Haas R. 2003. *Helicobacter pylori*  
667 vacuolating cytotoxin inhibits T lymphocyte activation. *Science* 301:1099-102.
- 668 41. Sundrud MS, Torres VJ, Unutmaz D, Cover TL. 2004. Inhibition of primary human T  
669 cell proliferation by *Helicobacter pylori* vacuolating toxin (VacA) is independent of  
670 VacA effects on IL-2 secretion. *Proc Natl Acad Sci U S A* 101:7727-32.
- 671 42. Frirdich E, Biboy J, Adams C, Lee J, Ellermeier J, Gielda LD, Dirita VJ, Girardin SE,  
672 Vollmer W, Gaynor EC. 2012. Peptidoglycan-modifying enzyme Pgp1 is required for  
673 helical cell shape and pathogenicity traits in *Campylobacter jejuni*. *PLoS Pathog*  
674 8:e1002602.
- 675 43. Frirdich E, Vermeulen J, Biboy J, Soares F, Taveirne ME, Johnson JG, DiRita VJ,  
676 Girardin SE, Vollmer W, Gaynor EC. 2014. Peptidoglycan LD-carboxypeptidase Pgp2  
677 influences *Campylobacter jejuni* helical cell shape and pathogenic properties and  
678 provides the substrate for the DL-carboxypeptidase Pgp1. *J Biol Chem* 289:8007-18.
- 679 44. Stahl M, Frirdich E, Vermeulen J, Badayeva Y, Li X, Vallance BA, Gaynor EC. 2016.  
680 The Helical Shape of *Campylobacter jejuni* Promotes In Vivo Pathogenesis by Aiding  
681 Transit through Intestinal Mucus and Colonization of Crypts. *Infect Immun* 84:3399-  
682 3407.
- 683 45. Lee A, O'Rourke J, De Ungria MC, Robertson B, Daskalopoulos G, Dixon MF. 1997. A  
684 standardized mouse model of *Helicobacter pylori* infection: introducing the Sydney  
685 strain. *Gastroenterology* 112:1386-97.
- 686 46. Wang Y, Roos KP, Taylor DE. 1993. Transformation of *Helicobacter pylori* by  
687 chromosomal metronidazole resistance and by a plasmid with a selectable  
688 chloramphenicol resistance marker. *J Gen Microbiol* 139:2485-93.

- 689 47. Lacayo CI, Pincus Z, VanDuijn MM, Wilson CA, Fletcher DA, Gertler FB, Mogilner A,  
690 Theriot JA. 2007. Emergence of large-scale cell morphology and movement from local  
691 actin filament growth dynamics. *PLoS Biol* 5:e233.
- 692 48. Baltrus DA, Amieva MR, Covacci A, Lowe TM, Merrell DS, Ottemann KM, Stein M,  
693 Salama NR, Guillemin K. 2009. The complete genome sequence of *Helicobacter pylori*  
694 strain G27. *J Bacteriol* 191:447-8.
- 695 49. Tomb JF, White O, Kerlavage AR, Clayton RA, Sutton GG, Fleischmann RD, Ketchum  
696 KA, Klenk HP, Gill S, Dougherty BA, Nelson K, Quackenbush J, Zhou L, Kirkness EF,  
697 Peterson S, Loftus B, Richardson D, Dodson R, Khalak HG, Glodek A, McKenney K,  
698 Fitzgerald LM, Lee N, Adams MD, Hickey EK, Berg DE, Gocayne JD, Utterback TR,  
699 Peterson JD, Kelley JM, Cotton MD, Weidman JM, Fujii C, Bowman C, Watthey L,  
700 Wallin E, Hayes WS, Borodovsky M, Karp PD, Smith HO, Fraser CM, Venter JC. 1997.  
701 The complete genome sequence of the gastric pathogen *Helicobacter pylori*. *Nature*  
702 388:539-47.  
703  
704

705 **Figure Legends**

706

707 **Figure 1. Experimental outline.** C57BL6/J mice were infected by oral gavage with wild-type

708 (PMSS1), straight rod mutants ( $\Delta csd6$ ), or *csd6* complemented *H. pylori* bacteria, or mock-

709 infected with broth. At the indicated time points, the stomach was removed and one third used to

710 determine bacterial load, one third for pathology evaluation, and one third for bacterial

711 localization within glands. C, corpus; A, antrum; CFU, colony-forming units; PFA,

712 paraformaldehyde; NBF, neutral-buffered formalin; H&E, hematoxylin and eosin; IHC,

713 immunohistochemistry.

714

715 **Figure 2. The *H. pylori* straight rod mutant  $\Delta csd6$  shows early colonization defects**

716 **compared to wild-type bacteria.** Single or competitive infections were performed with the

717 wild-type strain,  $\Delta csd6$ , *csd6* complemented, or broth (mock-infection control). (A) Stomach

718 loads at one day and one week of infection. \*\*\*  $P < 0.001$ , \*\*\*\*  $P < 0.0001$ , Kruskal-Wallis test

719 with Dunn's multiple test correction. (B) Competitive infections between wild-type and  $\Delta csd6$ ,

720 or *csd6* complemented and  $\Delta csd6$ , with lines connecting the bacterial load values for each

721 genotype from the same mouse. \*\*\*  $P < 0.001$ , \*\*\*\*  $P < 0.0001$ , Mann-Whitney U test. Dotted

722 line indicates the average limit of detection. Data are from two independent experiments with

723  $n=10$  mice per group. WT, wildtype; comp, complemented; wpi, week post-infection.

724

725 **Figure 3. The  $\Delta csd6$  straight rod mutant is attenuated in colonizing the corpus and antrum**

726 **at one week post-infection.** Thick stomach sections from the one week infections shown in **Figure**

727 **2A** were stained for *H. pylori* and the number of bacteria within the glands was quantified along

728 the entire length of the section. (A) Representative images of the antrum of a mouse infected with

729 wild-type *H. pylori* for one week. Shown are maximum intensity projections of Z-stacks, with blue  
730 (DAPI, left panel) staining nuclei and yellow staining *H. pylori*. Scale bar = 100  $\mu$ m. **(B–D)** Gland  
731 analysis for wild-type *H. pylori* **(B, same mouse as A)**,  $\Delta$ *csd6* **(C)** and *csd6* complemented **(D)**,  
732 showing the number of bacteria detected by immunofluorescence within glands along the length  
733 of the stomach in microns. Red bars indicate the corpus and blue indicate the antrum. **(E)** The total  
734 number of bacteria in the corpus and antral glands is shown for n = 2-3 mice per strain, with the  
735 CFU per gram of stomach for each mouse indicated on the graph. WT, wildtype; comp,  
736 complemented; wpi, week post-infection.

737

738 **Figure 4. Both wild-type *H. pylori* and the  $\Delta$ *csd6* straight rod mutant can expand into the**  
739 **corpus by one month post-infection.** Single infections were performed with the wild-type strain,  
740  $\Delta$ *csd6*, *csd6* complemented, or broth (mock-infection control). **(A)** Stomach loads at one month  
741 and three months post-infection. ns, not significant by Kruskal-Wallis test with Dunn’s multiple  
742 test correction. Data are from two independent experiments with n=15 mice per group; the limit  
743 of detection is shown with a dotted line. **(B and C)** Thick stomach sections from the one month  
744 infections shown in **A** were stained for *H. pylori* and the number of bacteria within the glands was  
745 quantified along the entire length of the section. For each bacterial strain, a mouse with a “low”  
746 CFU load (left panel) and a “high” CFU load (right panel) was analyzed. **(B)** The total number of  
747 bacteria in the corpus and antrum is shown for n = 2 mice per bacterial strain, with the CFU per  
748 gram of stomach for each mouse indicated on the graph. **(C)** Gland analysis for wild-type *H. pylori*,  
749  $\Delta$ *csd6* and *csd6* complemented strains, showing the number of bacteria within corpus and antral  
750 glands along the length of the stomach in microns. Red bars indicate the corpus and blue indicate  
751 the antrum. WT, wildtype; comp, complemented; wpi, week post-infection.

752

753 **Figure 5. The  $\Delta csd6$  straight rod mutants elicit less immunopathology compared to wild-type**  
754 **and  $csd6$  complemented bacteria.** Images of hematoxylin and eosin-stained sections from the  
755 three month infection, showing corpus, corpus/antral junction (box), and antral regions of the most  
756 severe histopathologic changes in each group. Right panels show higher magnification images  
757 (20x) within the enclosed black boxes of 10x images on the left. Arrows point to remaining parietal  
758 cells in corpus glands and the asterisks denote sites of infiltrating inflammatory cells. Images are  
759 from (A) Mock-infected, (B) wild-type-infected (HAI = 21,  $7.8 \times 10^3$  CFU/g stomach), (C)  $\Delta csd6$ -  
760 infected (HAI = 15,  $1.2 \times 10^5$  CFU/g stomach), and (D)  $csd6$  complemented-infected (HAI = 22,  
761  $4.0 \times 10^4$  CFU/g of stomach) mice. WT, wildtype; comp, complemented; HAI, histological activity  
762 index. Left panels scale bar = 100  $\mu\text{m}$ ; right panels scale bar = 50  $\mu\text{m}$ .

763

764 **Figure 6. Chronic  $\Delta csd6$  mutant infections show significantly less histological activity**  
765 **compared to wild-type and  $csd6$  complemented infections.** Thin stomach sections from the mice  
766 in **Figure 4A** were used for a blinded analysis of stomach inflammation and pathology. (A) The  
767 total histological activity index (HAI) is provided for mock-infected (“Mock”), wild-type,  $\Delta csd6$ ,  
768 and the  $csd6$  complemented strain at one and three months of infection. Mean  $\pm$  standard deviations  
769 are shown. \*  $P < 0.05$ , Kruskal-Wallis test with Dunn’s multiple test correction. (B) Plot showing  
770 the correlation between wild-type and  $\Delta csd6$  stomach colonization loads and total HAI.

771



772 **Supplemental Figure Legends**

773

774 **Figure S1. Complementation of *csd6* restores helical cell shape.** (A) Representative phase  
775 contrast images of wild-type PMSS1 bacteria, straight rod ( $\Delta csd6$ ), and *csd6* complemented  
776 bacteria. Images were acquired at 100 X (oil immersion objective). Scale bar = 5  $\mu$ m. (B) Side  
777 curvature vs. cell length ( $\mu$ m) for individual bacterial cells imaged using phase contrast  
778 microscopy of wild-type PMSS1 (orange, n=218),  $\Delta csd6$  (magenta, n=230), and the *csd6*  
779 complemented strain (blue, n=212). (C) Smooth histograms summarizing the side curvature  
780 distributions acquired for each strain shown in B. No significant difference in side curvature  
781 distributions were observed between wild-type and the *csd6* complemented strain ( $p = 0.64078$ )  
782 using Kolmogorov-Smirnov statistics of side curvature distributions. Significant differences in  
783 side curvature distributions were observed between wild-type and  $\Delta csd6$ , and between  $\Delta csd6$  and  
784 the *csd6* complemented strain, where  $p < 0.00001$ . Data are from two independent experiments.

785

786 **Figure S2. 3D-visualization of *H. pylori* and bacterial quantitation by volumetric image**  
787 **analysis.** (A) Representative 3D image of wild-type PMSS1 bacteria (green), which was fixed in  
788 2% PFA, embedded in 4% agarose, and sectioned to generate 200  $\mu$ m thick sections. 3D-images  
789 were generated from Z-stacks collected at 63 X (oil-immersion objective) with a Zeiss LSM 780  
790 confocal microscope. (B) Volumetric image analysis of bacterial cells fixed in 2% PFA (n= 203).  
791 Bars indicate the mean. Data are from two independent experiments.

792

793 **Figure S3. Visualization of bacteria within gastric glands.** Thick stomach sections from the one  
794 week infections shown in **Figure 2A** were stained for *H. pylori*. Shown are representative images

795 of the antrum of a mouse infected with  $\Delta csd6$  (**A**) or *csd6* complemented (**B**) bacteria. Images are  
796 maximum intensity projections of Z-stacks, with blue (DAPI, left panel) staining nuclei and yellow  
797 staining *H. pylori*. Scale bars = 100  $\mu$ m. Volumetric analysis for the mouse in **A** is found in **Figure**  
798 **3C** and **B** is in **Figure 3D**.

799

800 **Figure S4. The  $\Delta csd6$  mutant results in decreased inflammation and hyperplasia scores at**  
801 **one and three months of infection.** Inflammation (A and C) and hyperplasia (B and D) scores in  
802 the corpus/antrum (C/A) junction and antrum at one month (A and B) and three months (C and D)  
803 of infection (n=9-11 mice per group). Provided are pathological evaluation scores for all gastric  
804 tissue sections analyzed and shown in Fig 5. \*  $P < 0.05$ , \*\*  $P < 0.01$ , \*\*\*  $P < 0.001$ , Kruskal-Wallis  
805 test with Dunn's multiple test correction.

Oral gavage  
 $5 \times 10^7$  *H. pylori* cells/mouse

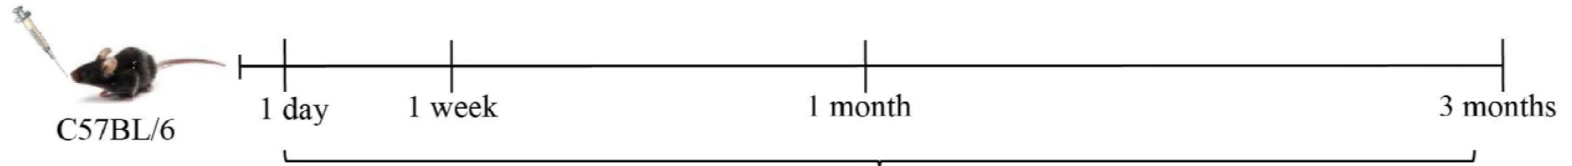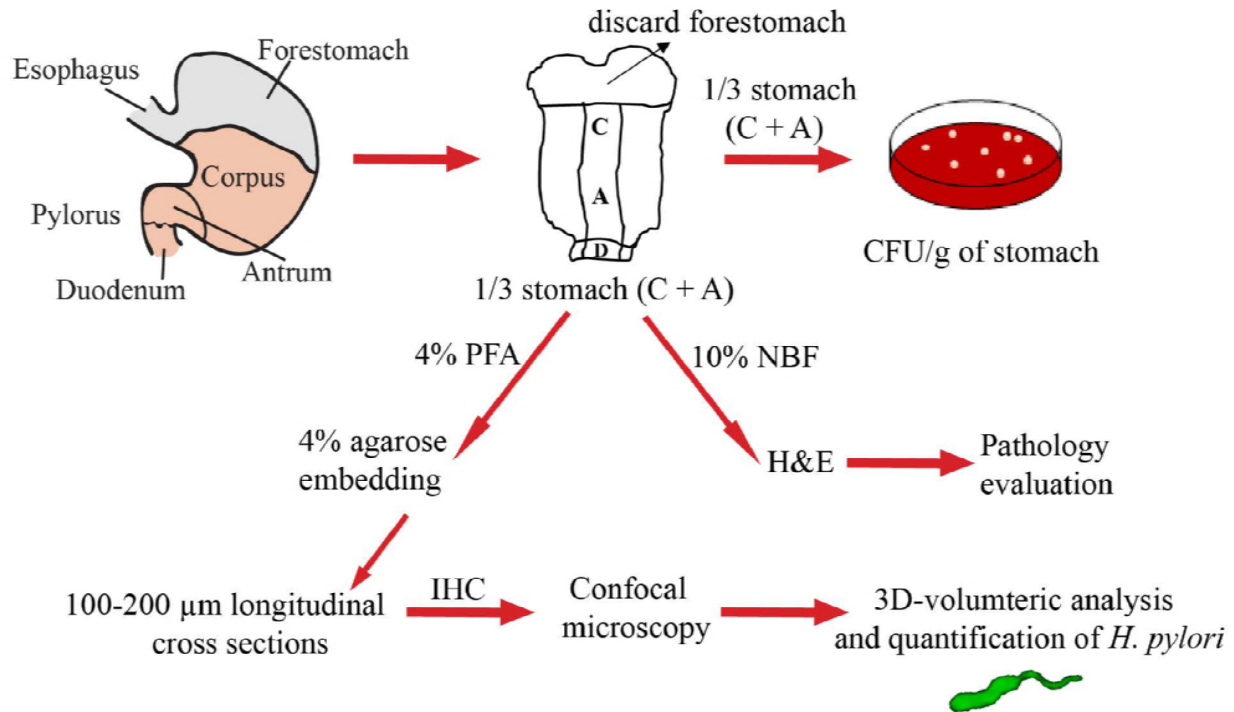

**Figure 1. Experimental outline.** C57BL6/J mice were infected by oral gavage with wild-type (PMSS1), straight rod mutants ( $\Delta csd6$ ), or *csd6* complemented *H. pylori* bacteria, or mock-infected with broth. At the indicated time points, the stomach was removed and one third used to determine bacterial load, one third for pathology evaluation, and one third for bacterial localization within glands. C, corpus; A, antrum; CFU, colony-forming units; PFA, paraformaldehyde; NBF, neutral-buffered formalin; H&E, hematoxylin and eosin; IHC, immunohistochemistry.

**A.**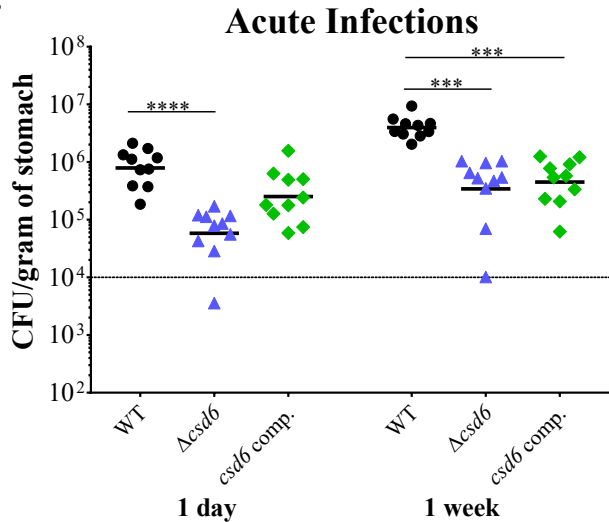**B.**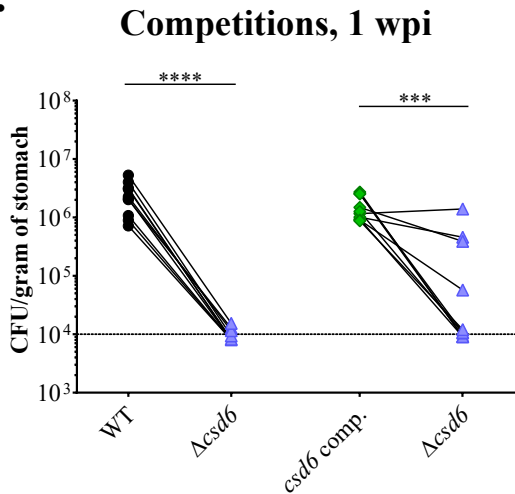

**Figure 2. The *H. pylori* straight rod mutant  $\Delta csd6$  shows early colonization defects**

**compared to wild-type bacteria.** Single or competitive infections were performed with the wild-type strain,  $\Delta csd6$ , *csd6* complemented, or broth (mock-infection control). **(A)** Stomach loads at one day and one week of infection. \*\*\*  $P < 0.001$ , \*\*\*\*  $P < 0.0001$ , Kruskal-Wallis test with Dunn's multiple test correction. **(B)** Competitive infections between wild-type and  $\Delta csd6$ , or *csd6* complemented and  $\Delta csd6$ , with lines connecting the bacterial load values for each genotype from the same mouse. \*\*\*  $P < 0.001$ , \*\*\*\*  $P < 0.0001$ , Mann-Whitney U test. Dotted line indicates the average limit of detection. Data are from two independent experiments with  $n=10$  mice per group. WT, wildtype; comp, complemented; wpi, week post-infection.

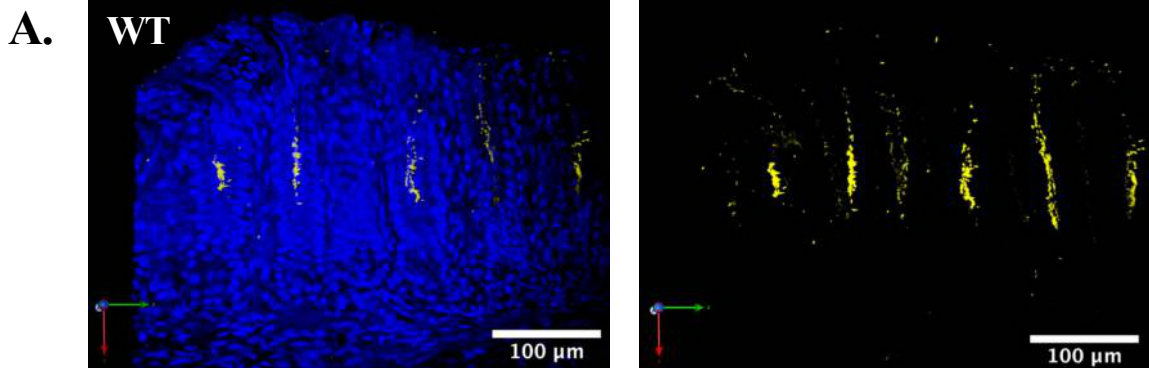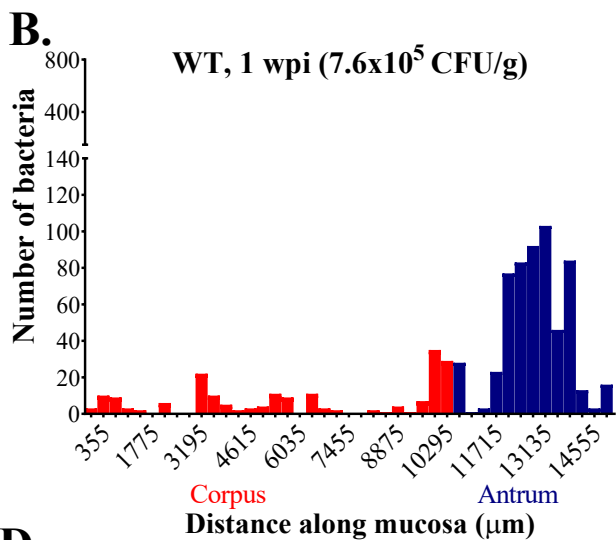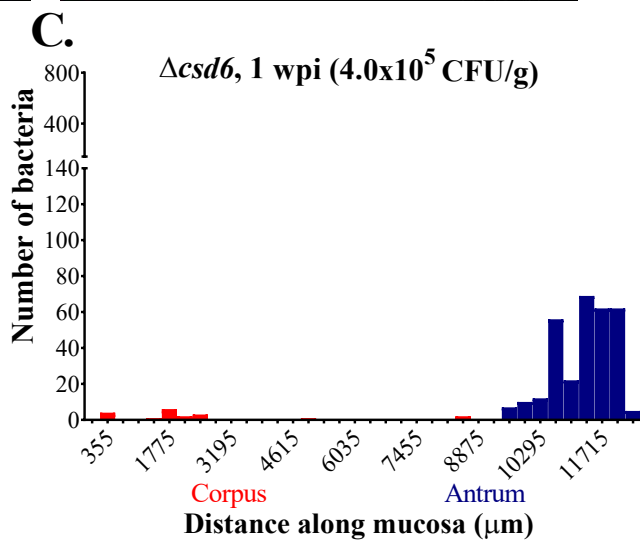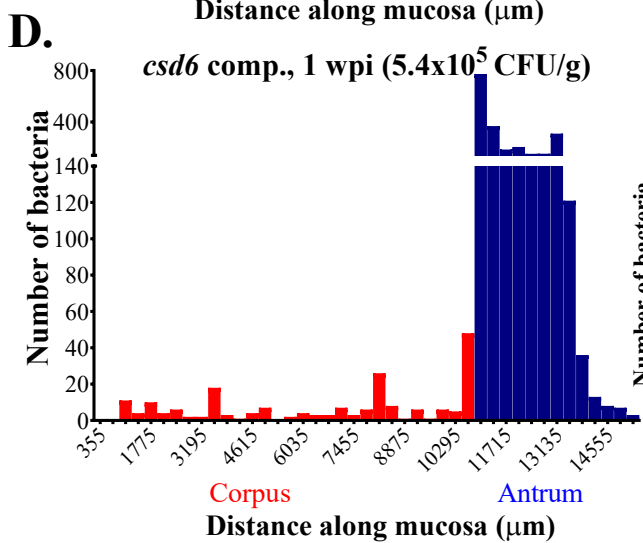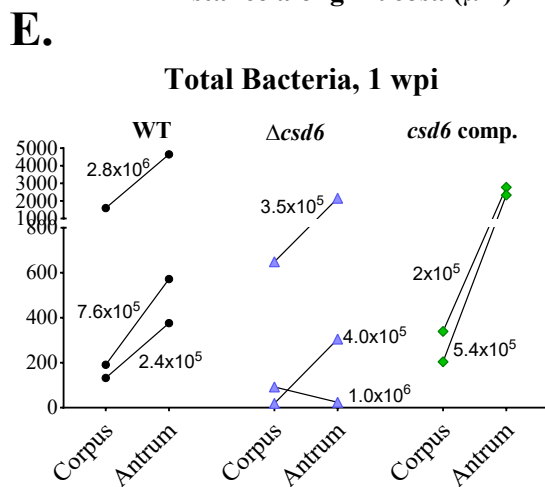



**Figure 3. The  $\Delta csd6$  straight rod mutant is attenuated in colonizing the corpus and antrum at one week post-infection.** Thick stomach sections from the one week infections shown in **Figure 2A** were stained for *H. pylori* and the number of bacteria within the glands was quantified along the entire length of the section. **(A)** Representative images of the antrum of a mouse infected with wild-type *H. pylori* for one week. Shown are maximum intensity projections of Z-stacks, with blue (DAPI, left panel) staining nuclei and yellow staining *H. pylori*. Scale bar = 100  $\mu\text{m}$ . **(B – D)** Gland analysis for wild-type *H. pylori* **(B, same mouse as A)**,  $\Delta csd6$  **(C)** and *csd6* complemented **(D)**, showing the number of bacteria detected by immunofluorescence within glands along the length of the stomach in microns. Red bars indicate the corpus and blue indicate the antrum. **(E)** The total number of bacteria in the corpus and antral glands is shown for  $n = 2-3$  mice per strain, with the CFU per gram of stomach for each mouse indicated on the graph. WT, wildtype; comp, complemented; wpi, week post-infection.

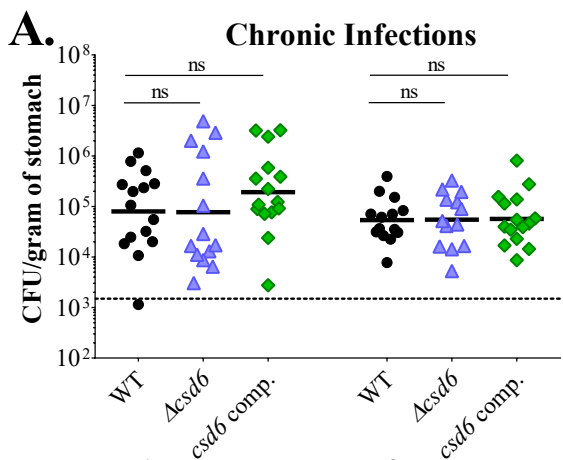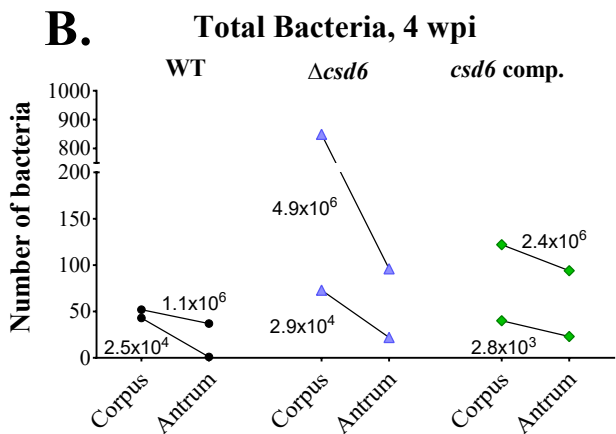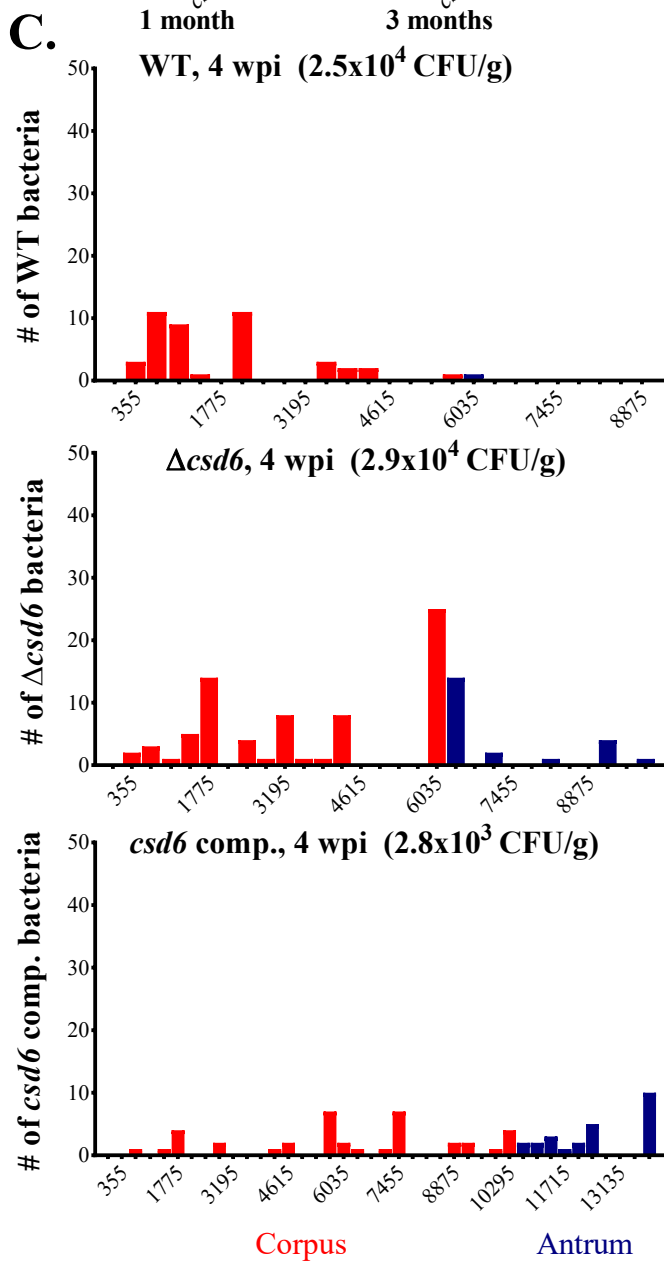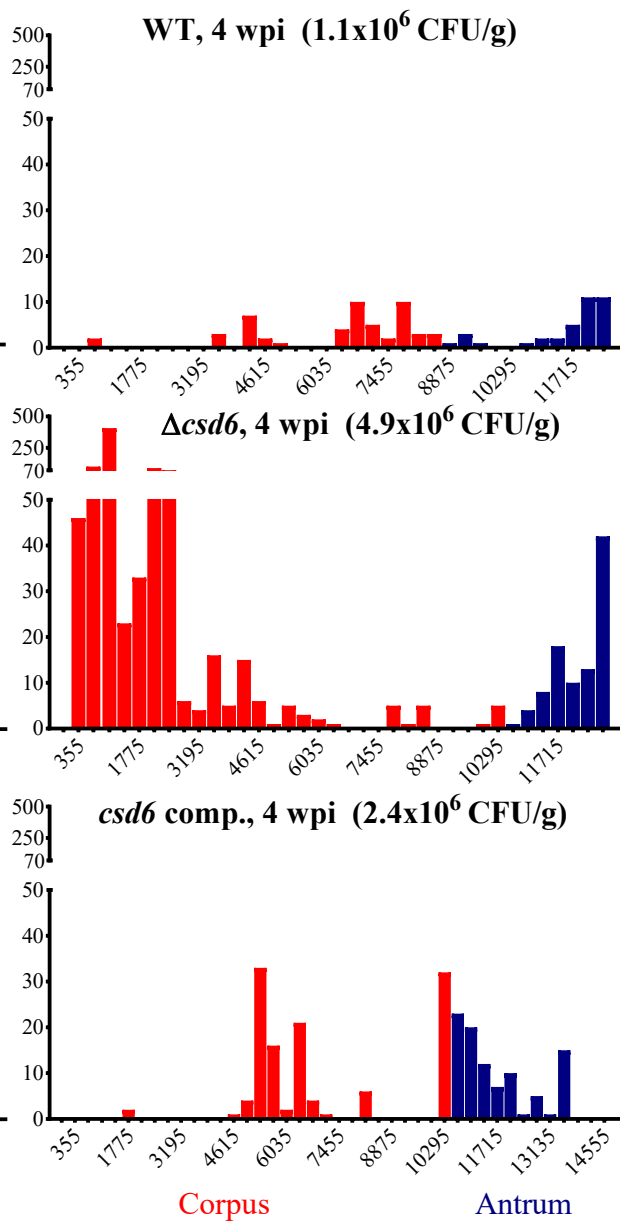

**Figure 4. Both wild-type *H. pylori* and the  $\Delta csd6$  straight rod mutant can expand into the corpus by one month post-infection.** Single infections were performed with the wild-type strain,  $\Delta csd6$ , *csd6* complemented, or broth (mock-infection control). **(A)** Stomach loads at one month and three months post-infection. ns, not significant by Kruskal-Wallis test with Dunn’s multiple test correction. Data are from two independent experiments with n=15 mice per group; the limit of detection is shown with a dotted line. **(B and C)** Thick stomach sections from the one month infections shown in **A** were stained for *H. pylori* and the number of bacteria within the glands was quantified along the entire length of the section. For each bacterial strain, a mouse with a “low” CFU load (left panel) and a “high” CFU load (right panel) was analyzed. **(B)** The total number of bacteria in the corpus and antrum is shown for n = 2 mice per bacterial strain, with the CFU per gram of stomach for each mouse indicated on the graph. **(C)** Gland analysis for wild-type *H. pylori*,  $\Delta csd6$  and *csd6* complemented strains, showing the number of bacteria within corpus and antral glands along the length of the stomach in microns. Red bars indicate the corpus and blue indicate the antrum. WT, wildtype; comp, complemented; wpi, week post-infection.



**A. Antrum**

**Corpus**

**Mock-infected**

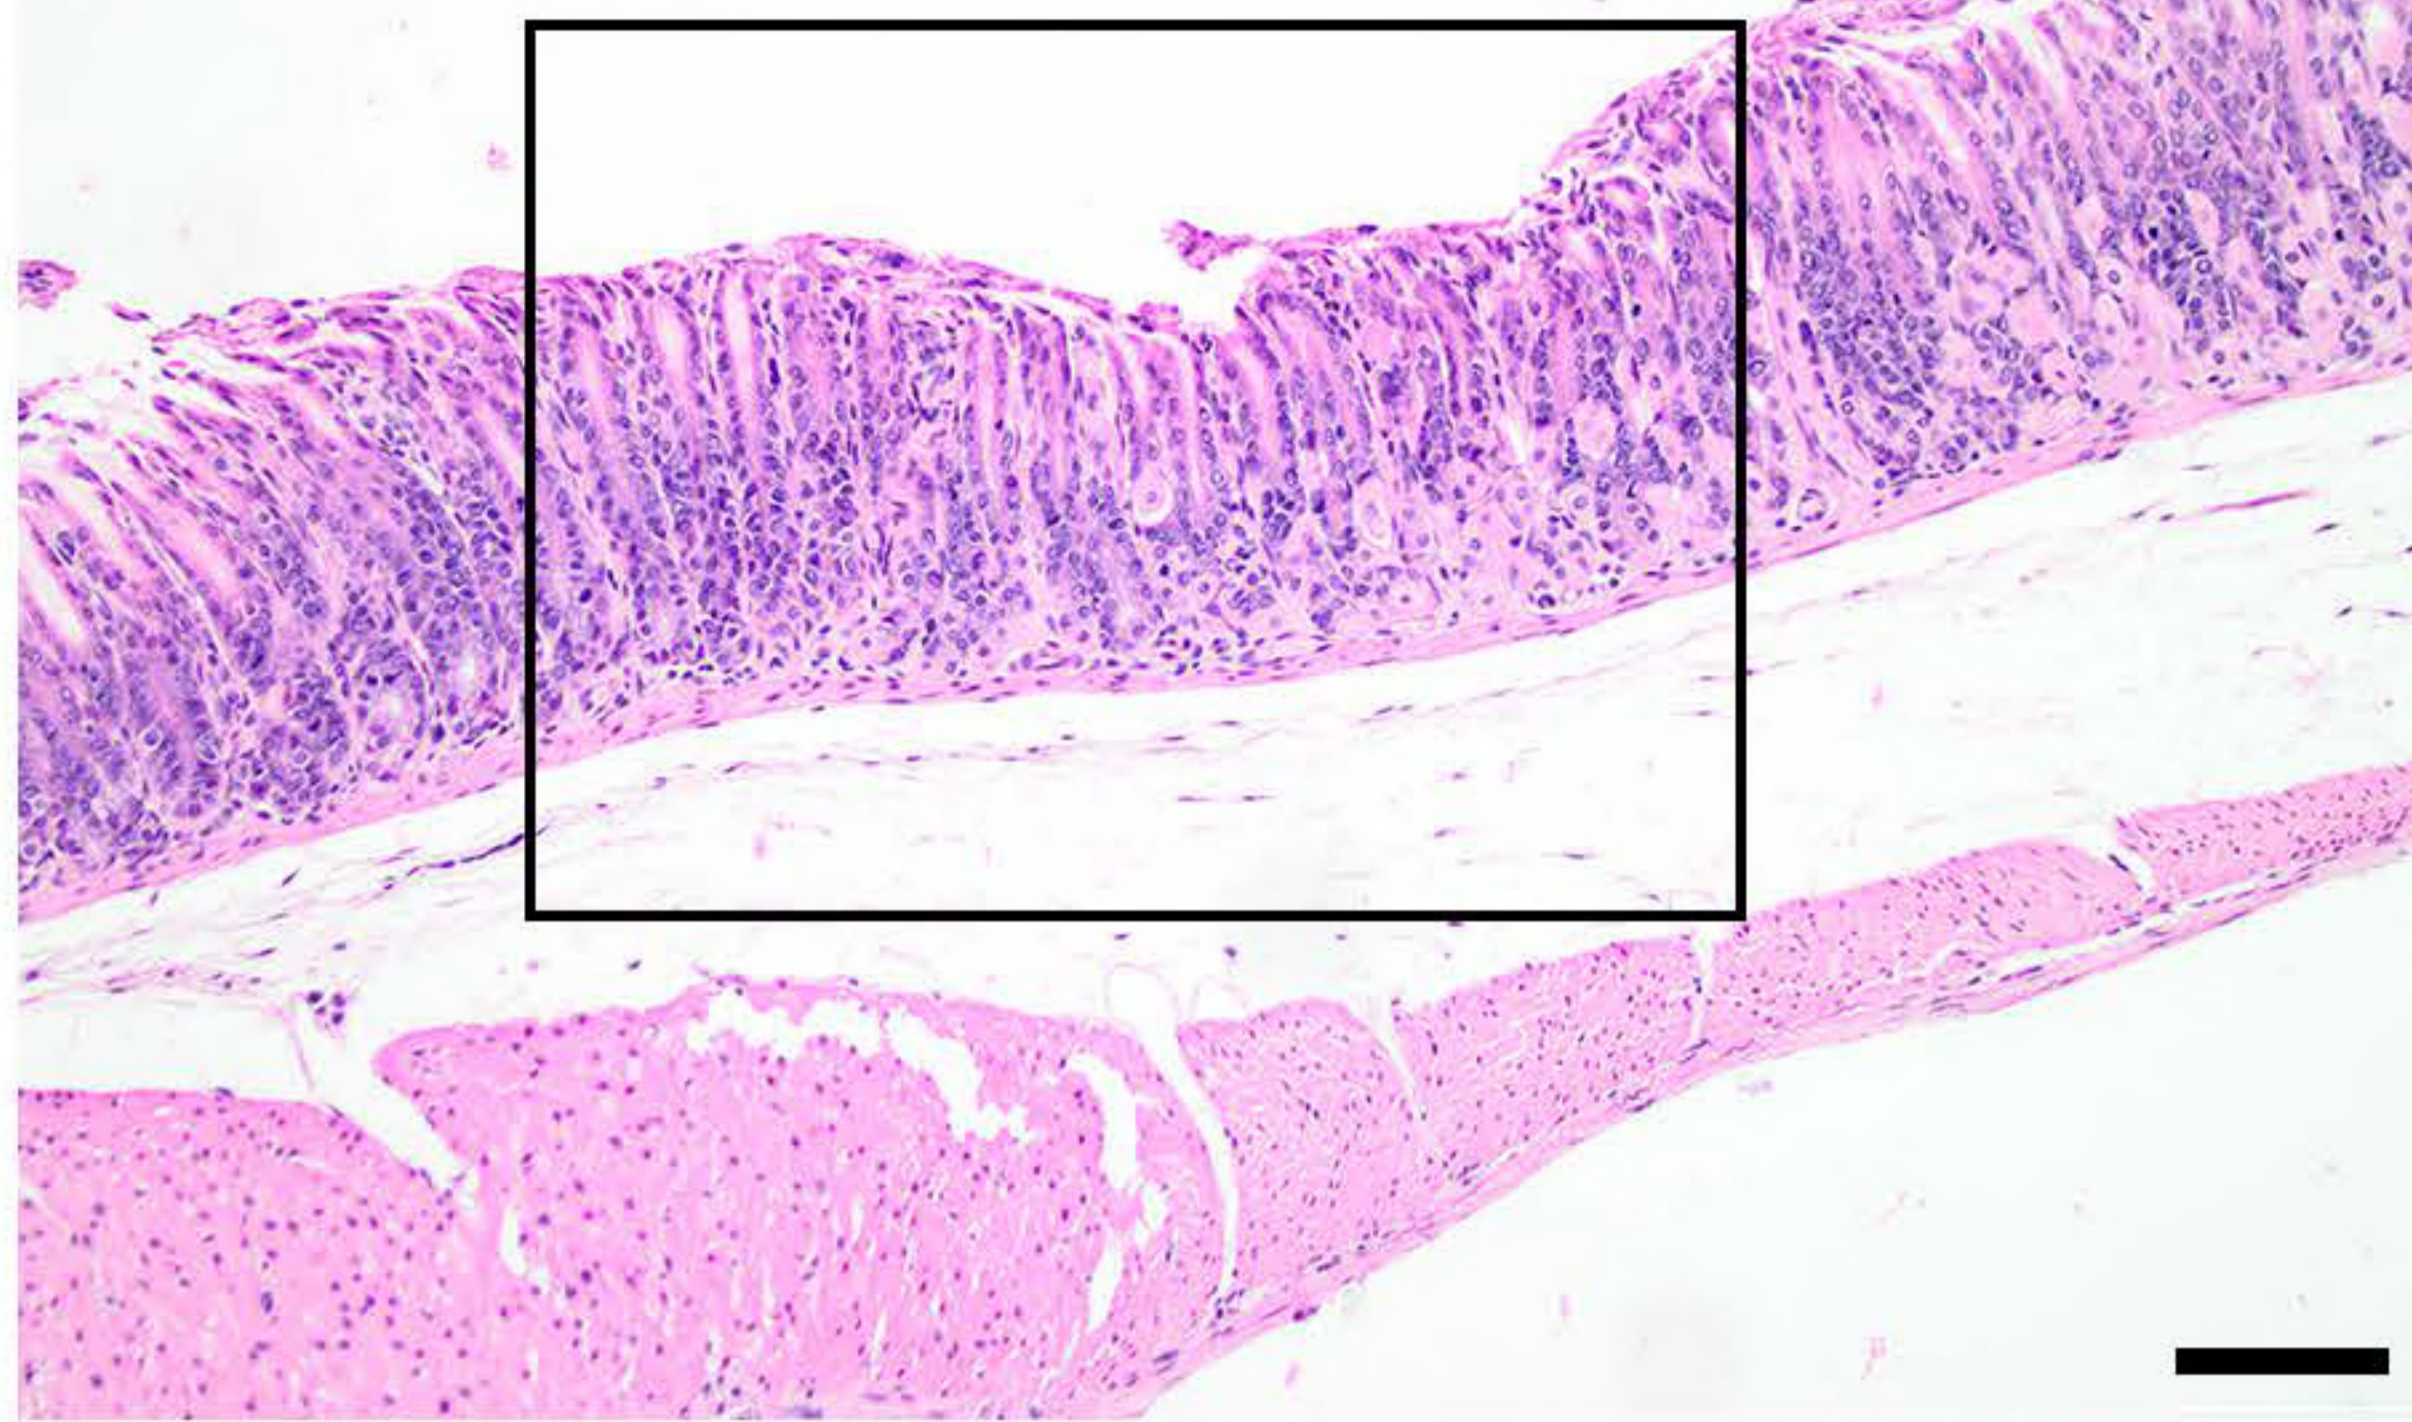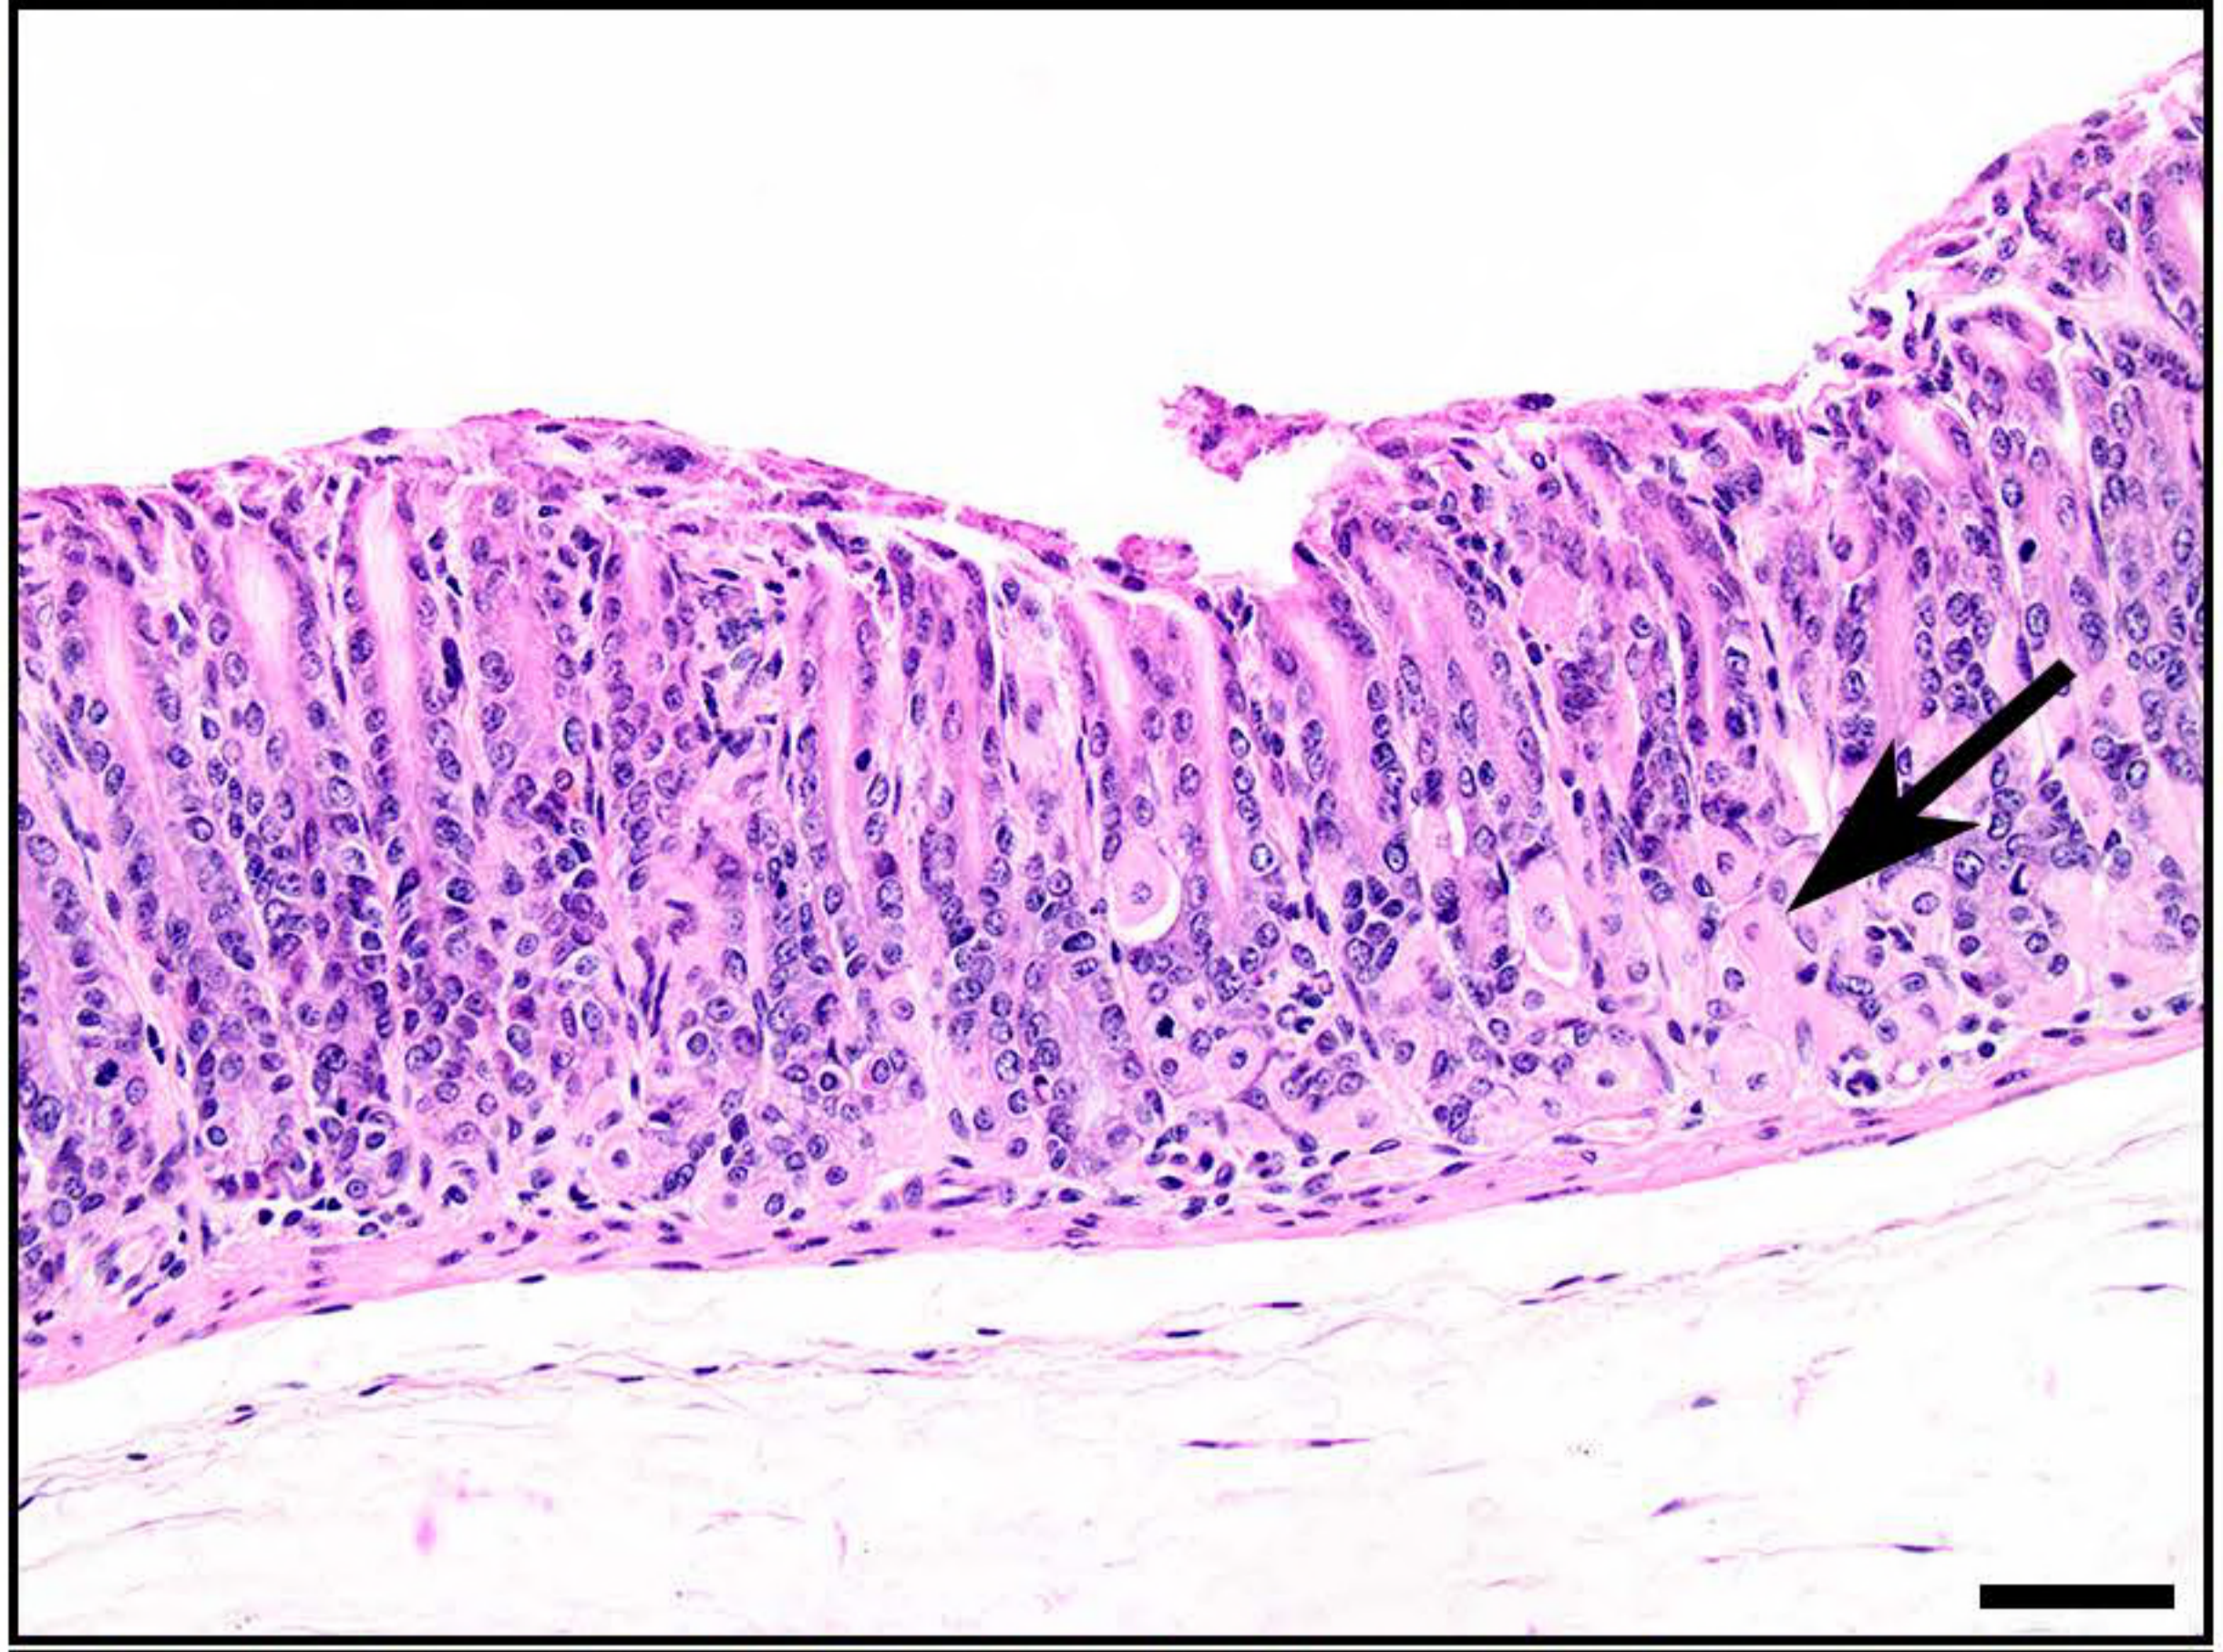

**B. Antrum**

**Corpus**

**Wild-type**

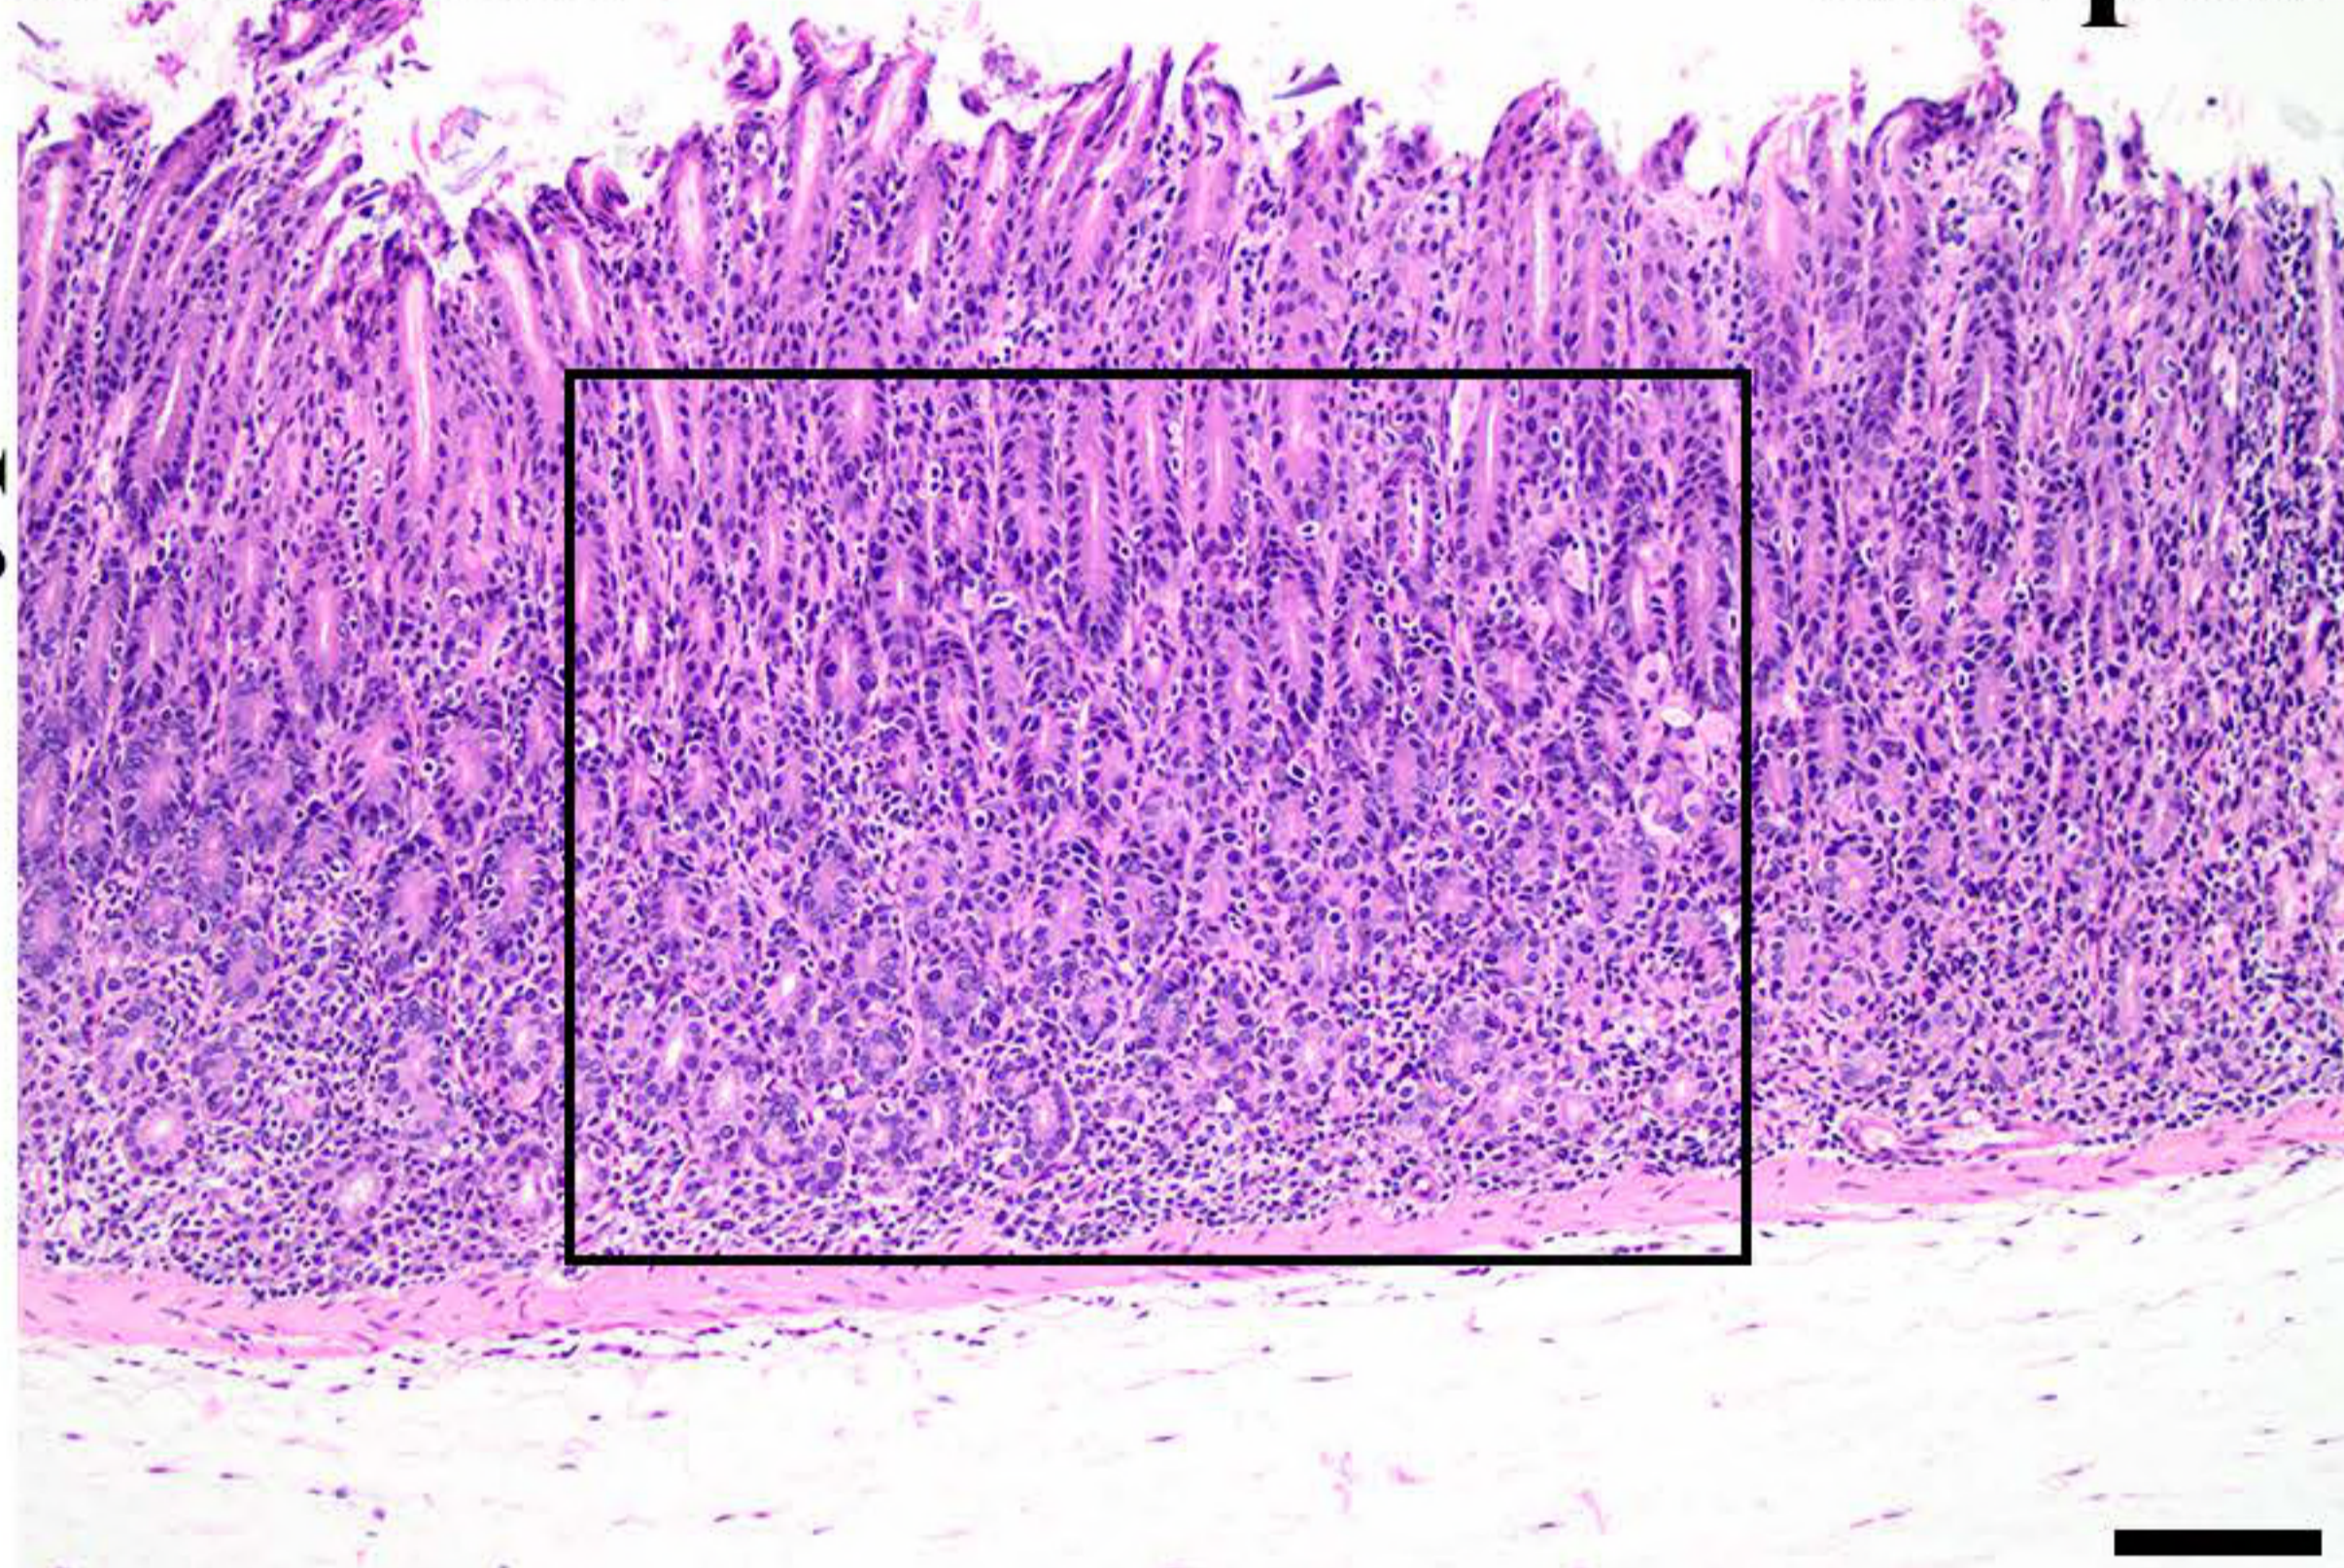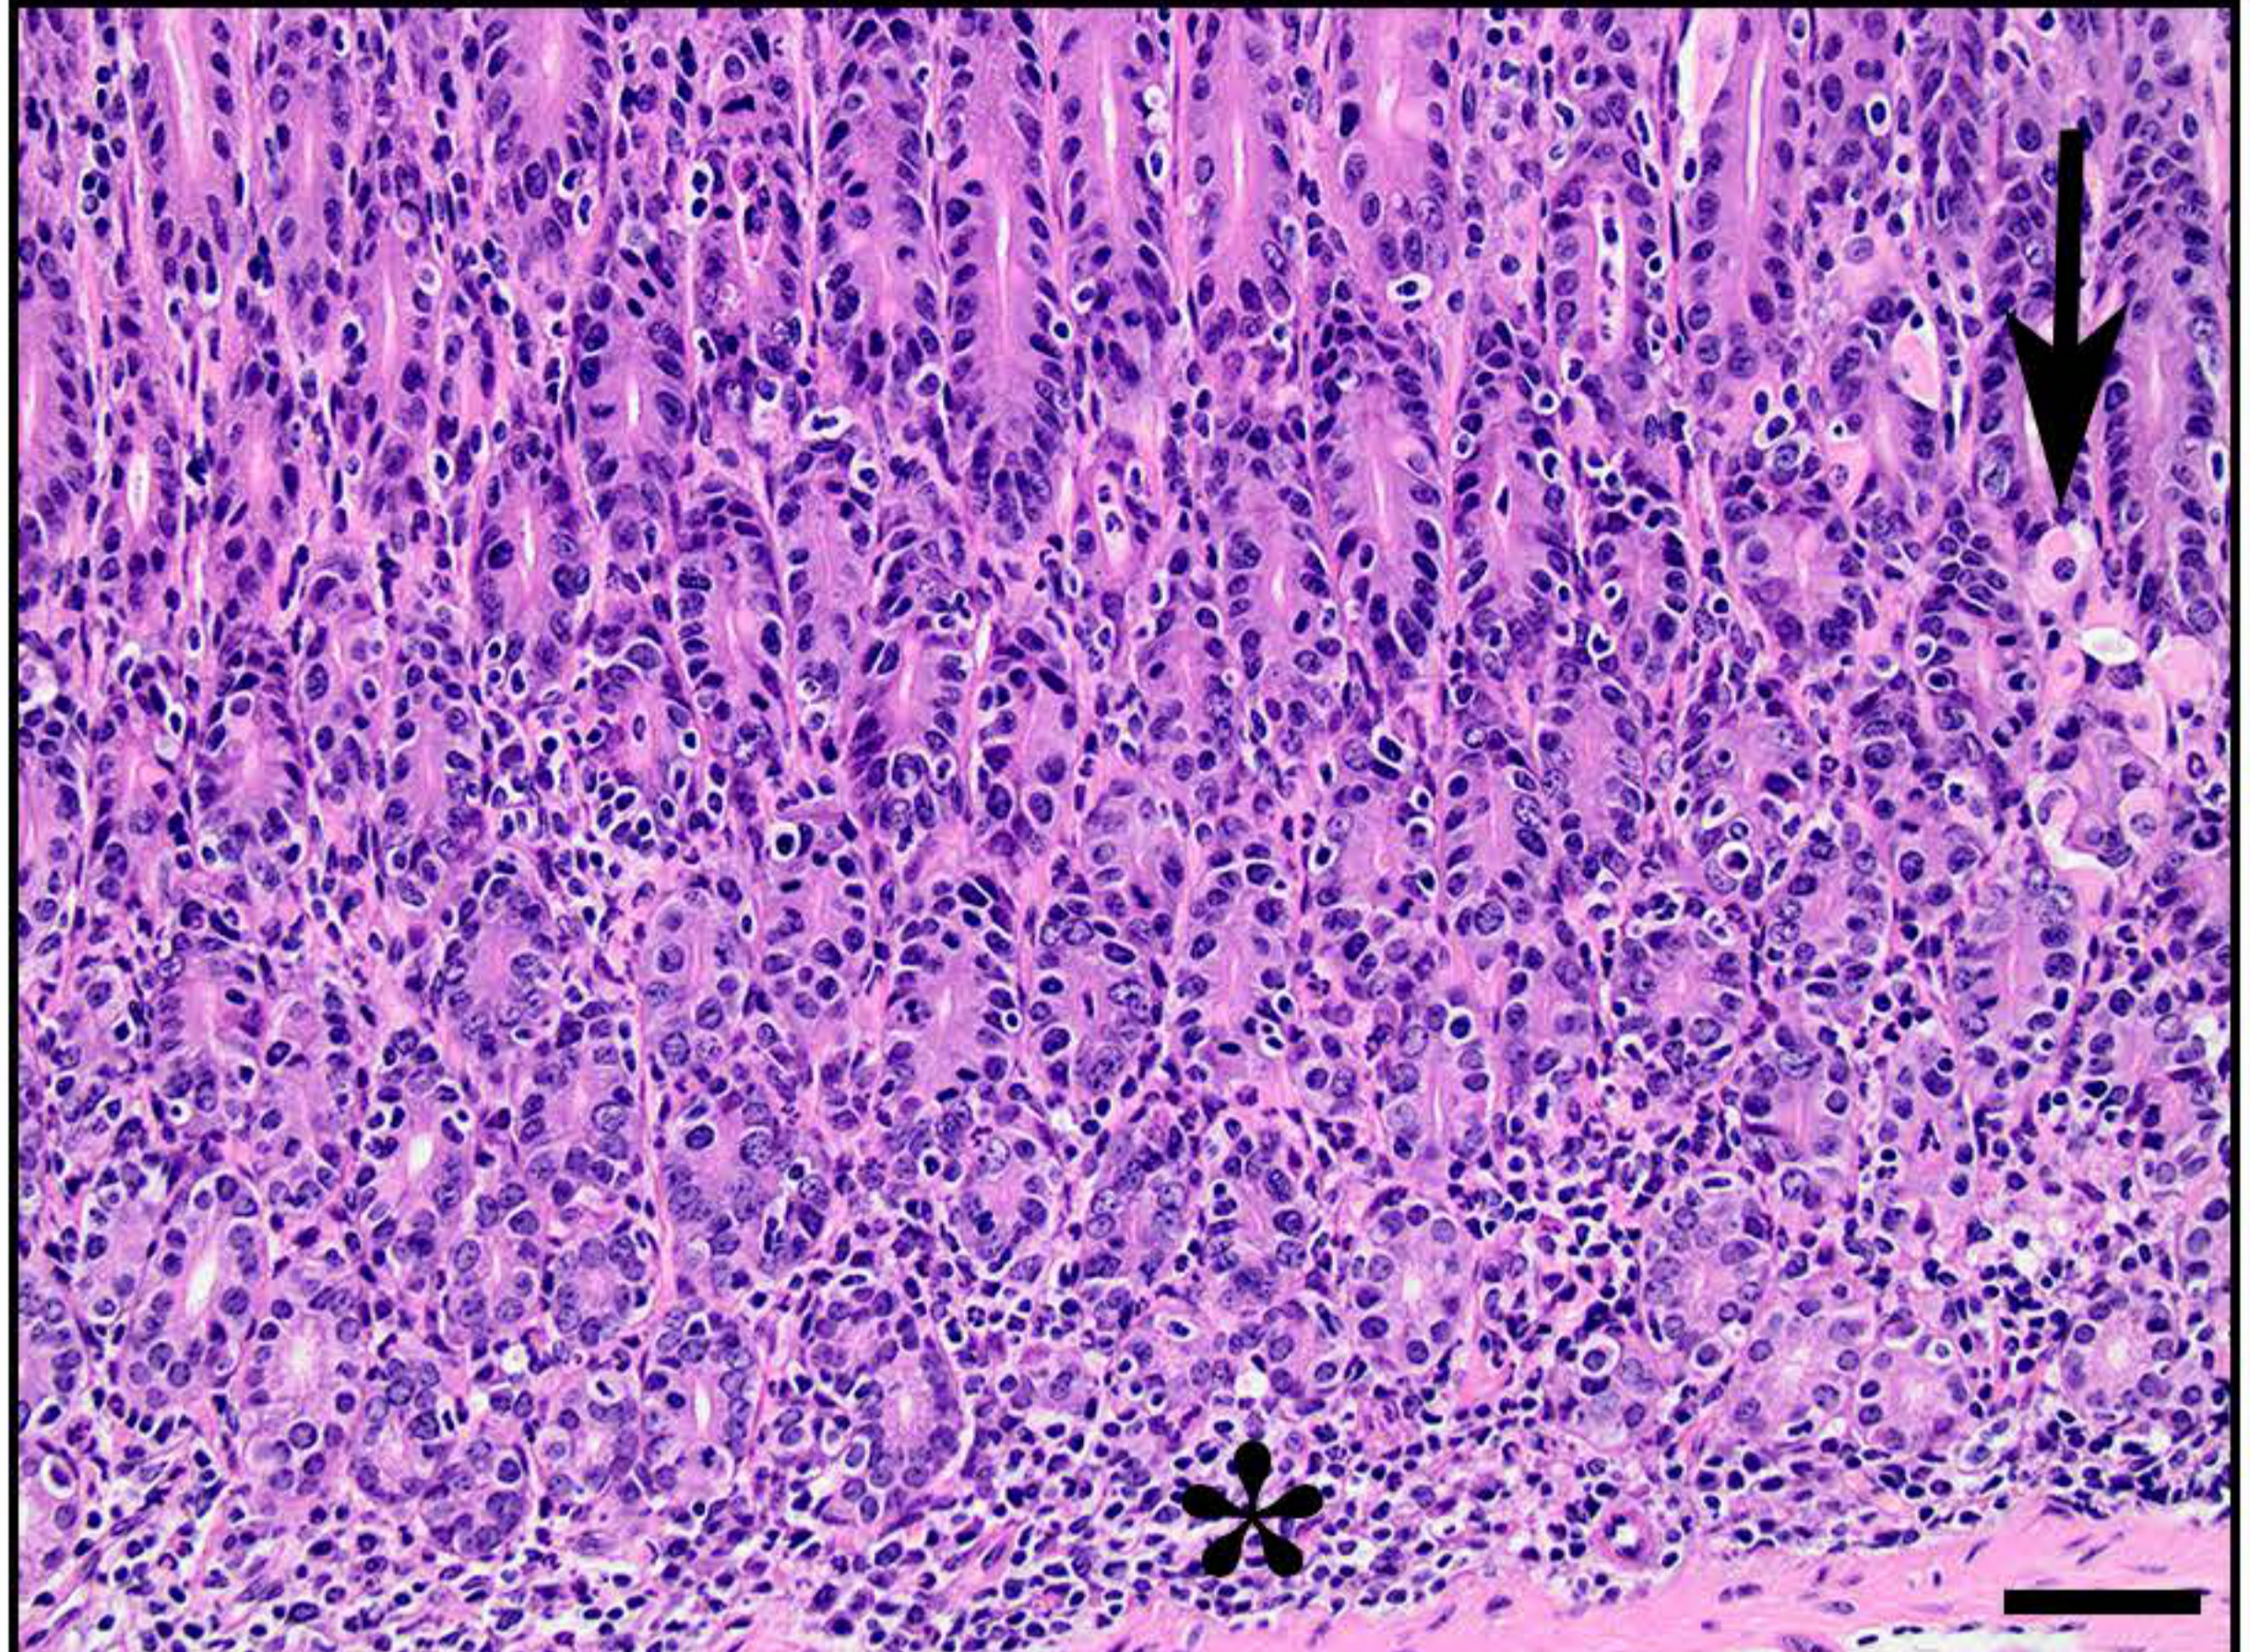

**C. Antrum**

**Corpus**

**$\Delta csd6$**

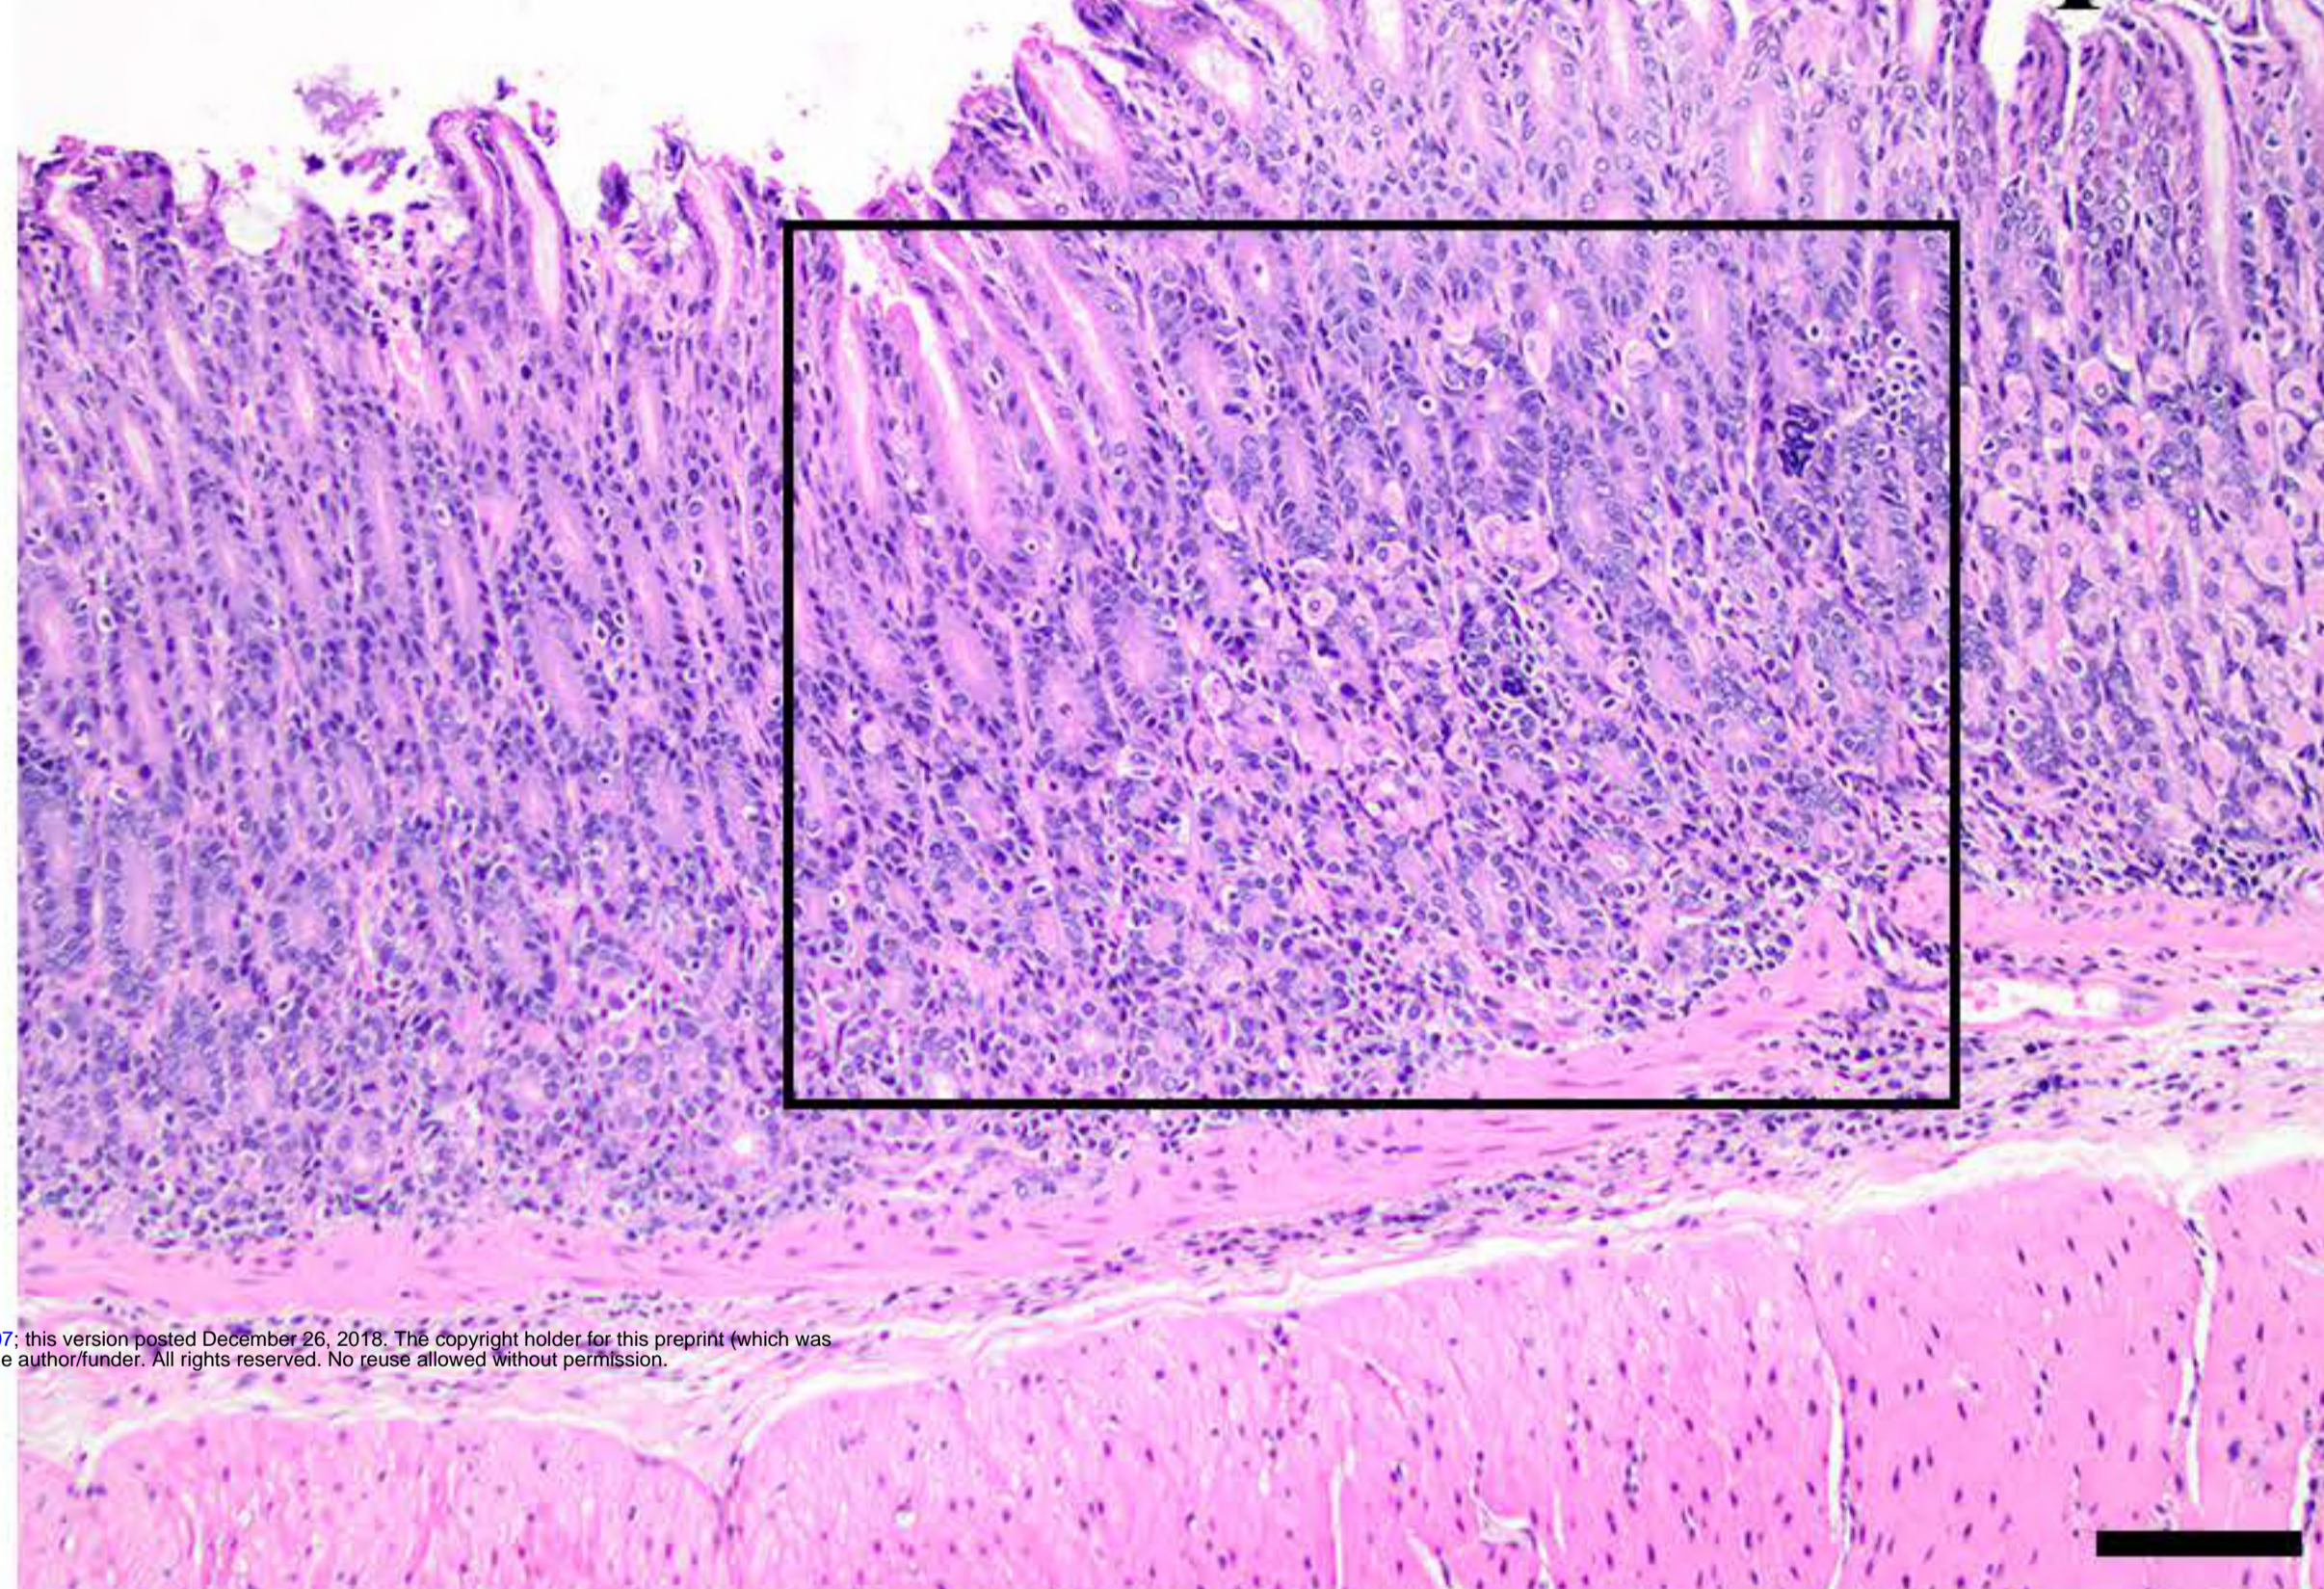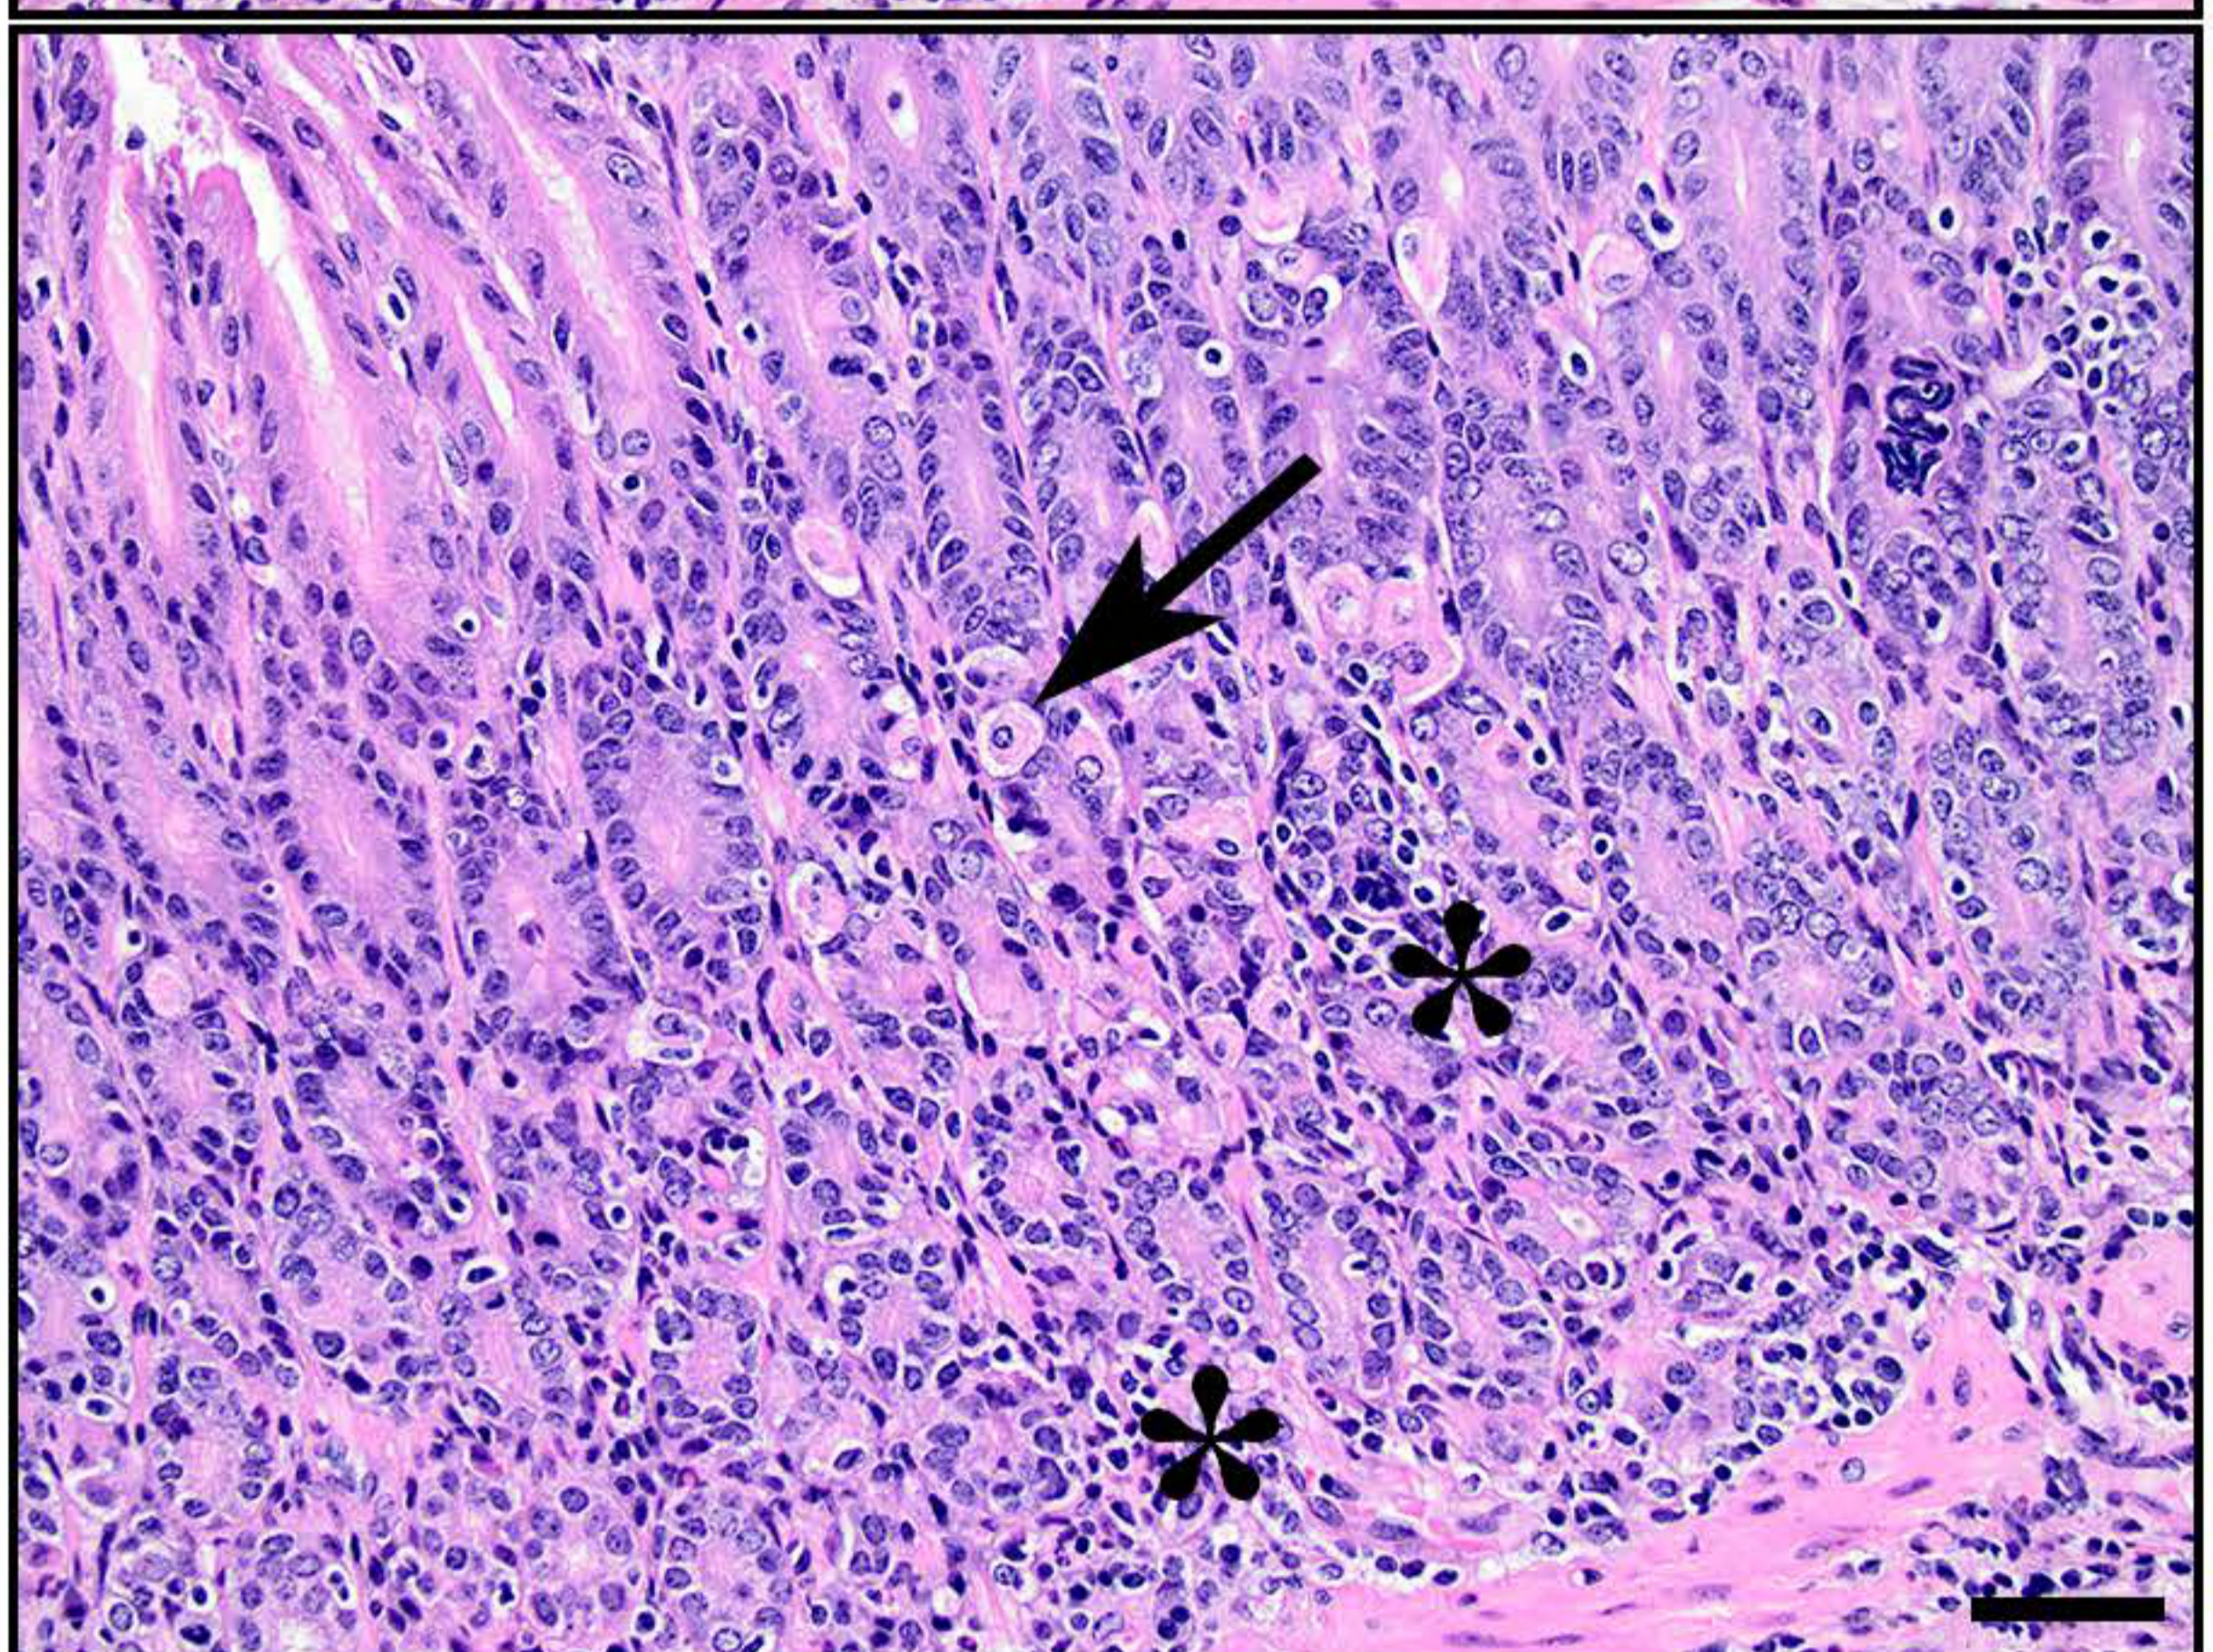

**D. Antrum**

**Corpus**

***csd6* comp.**

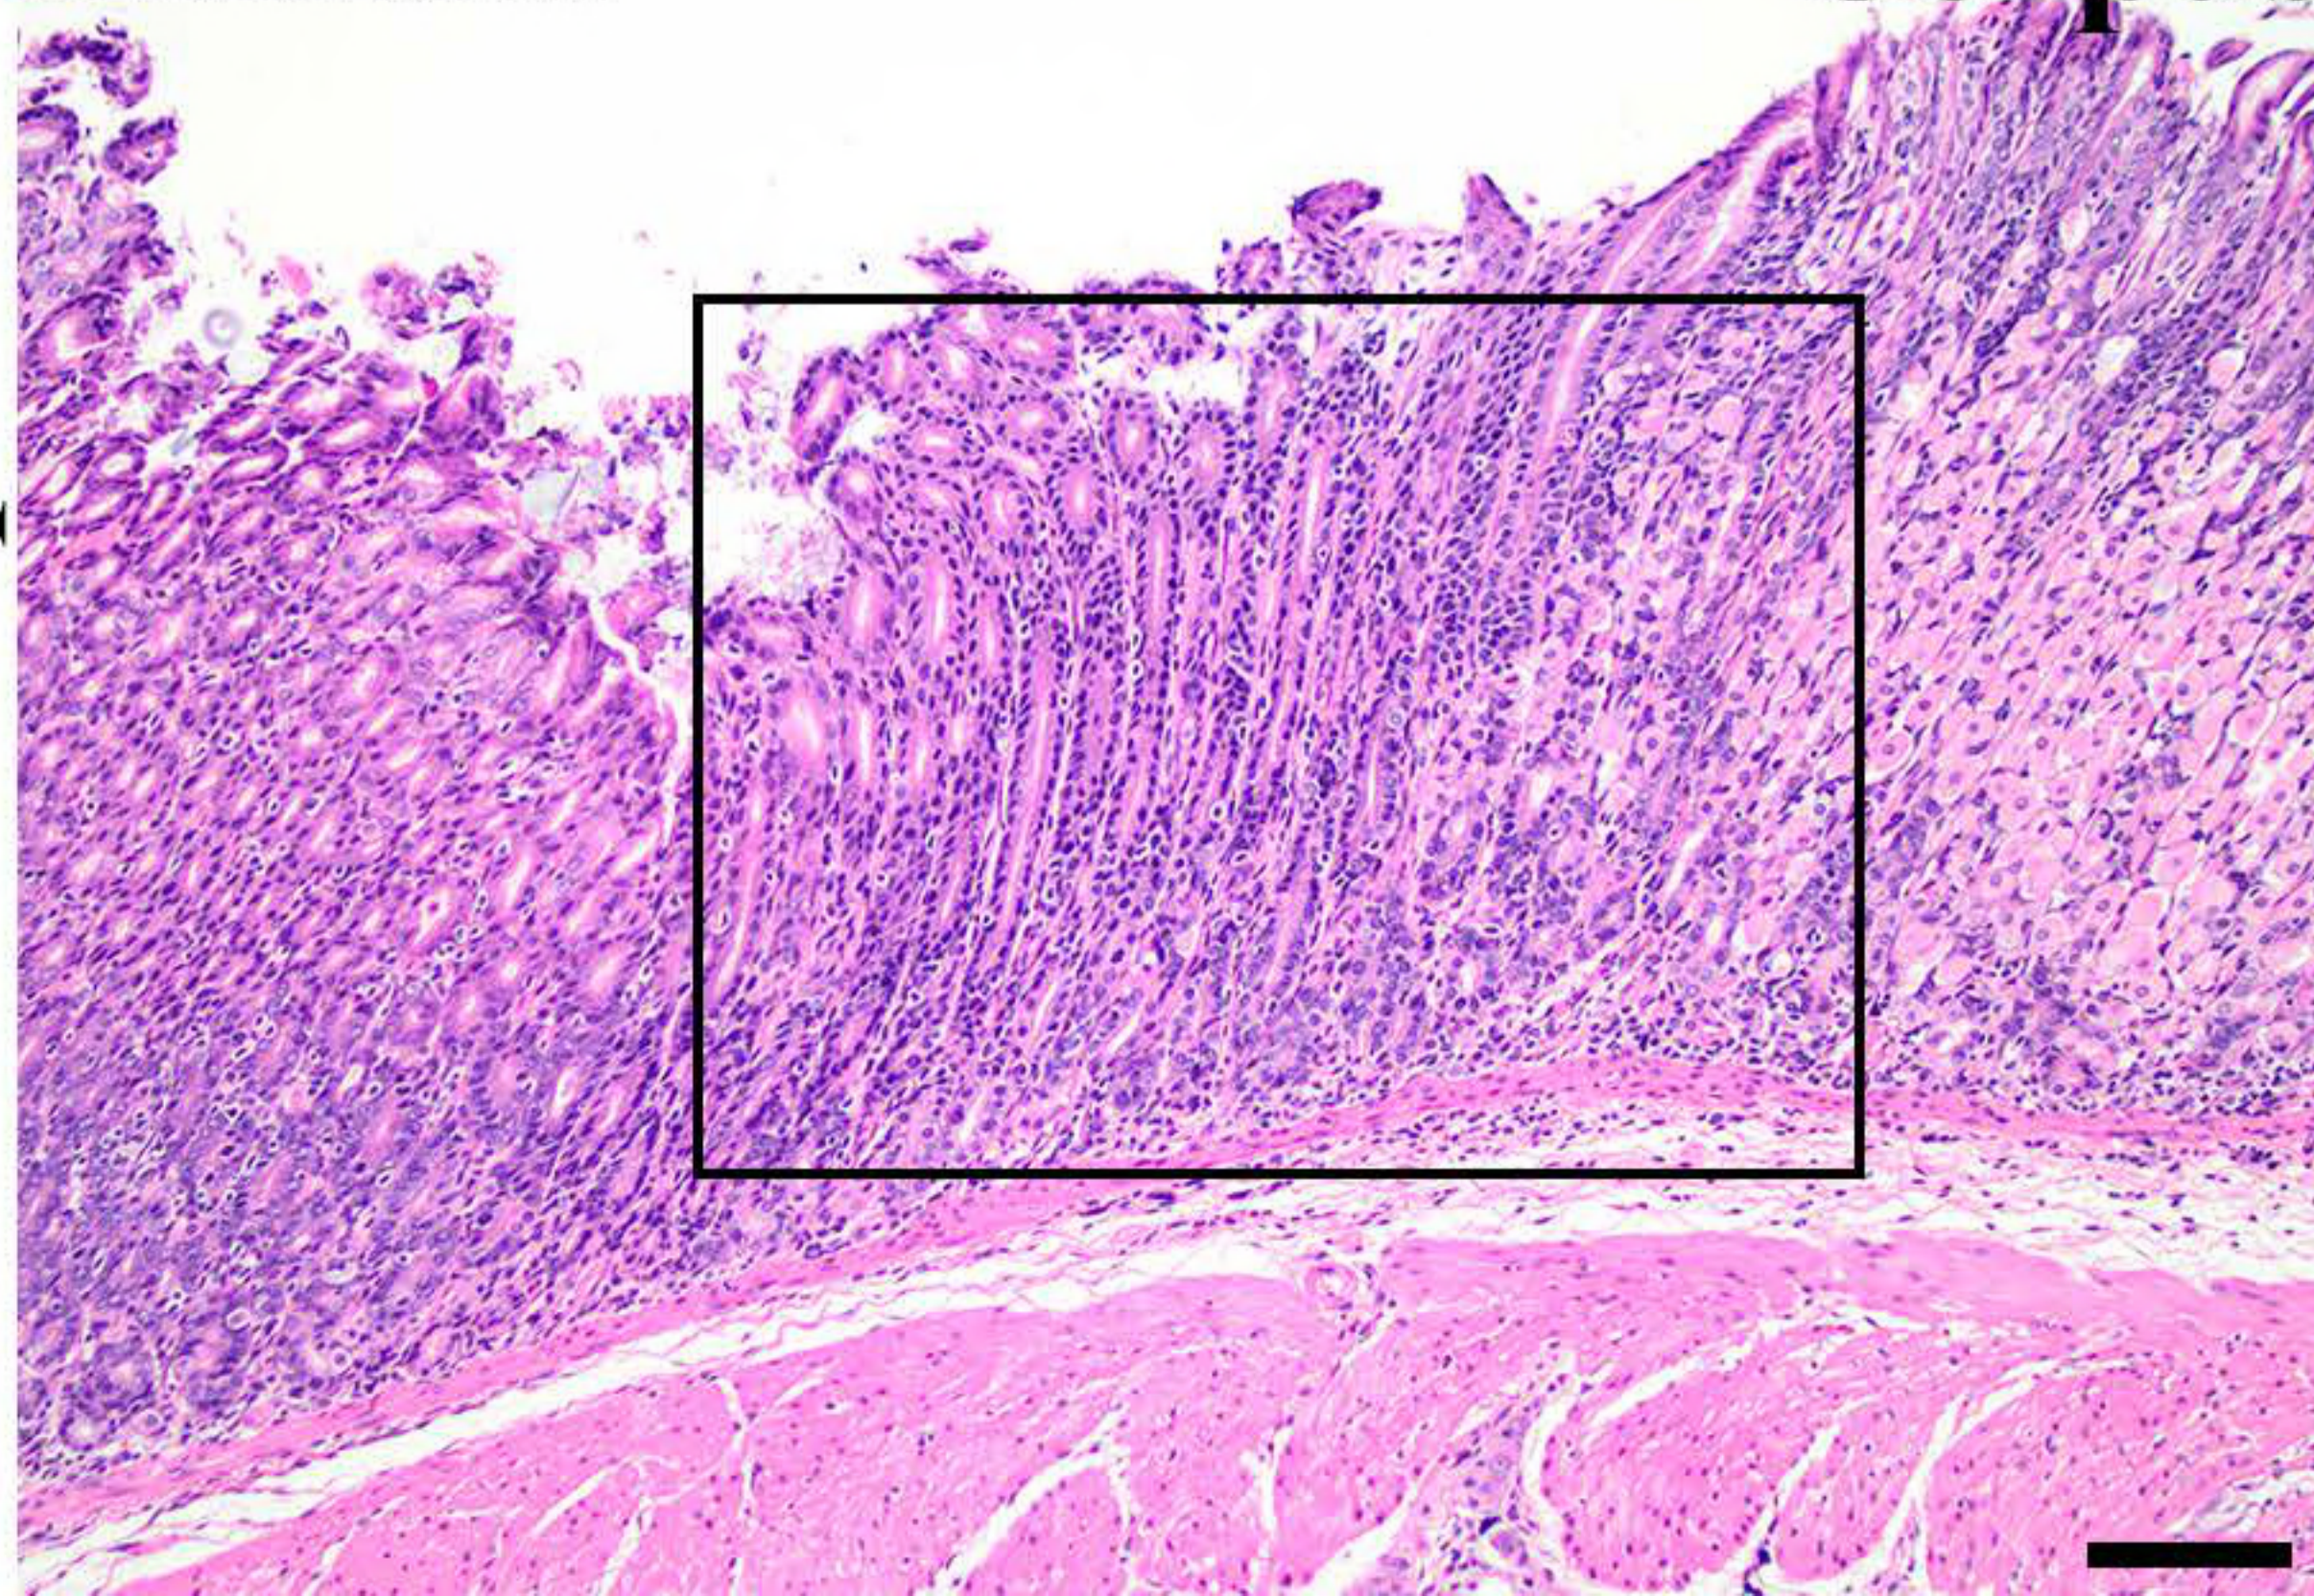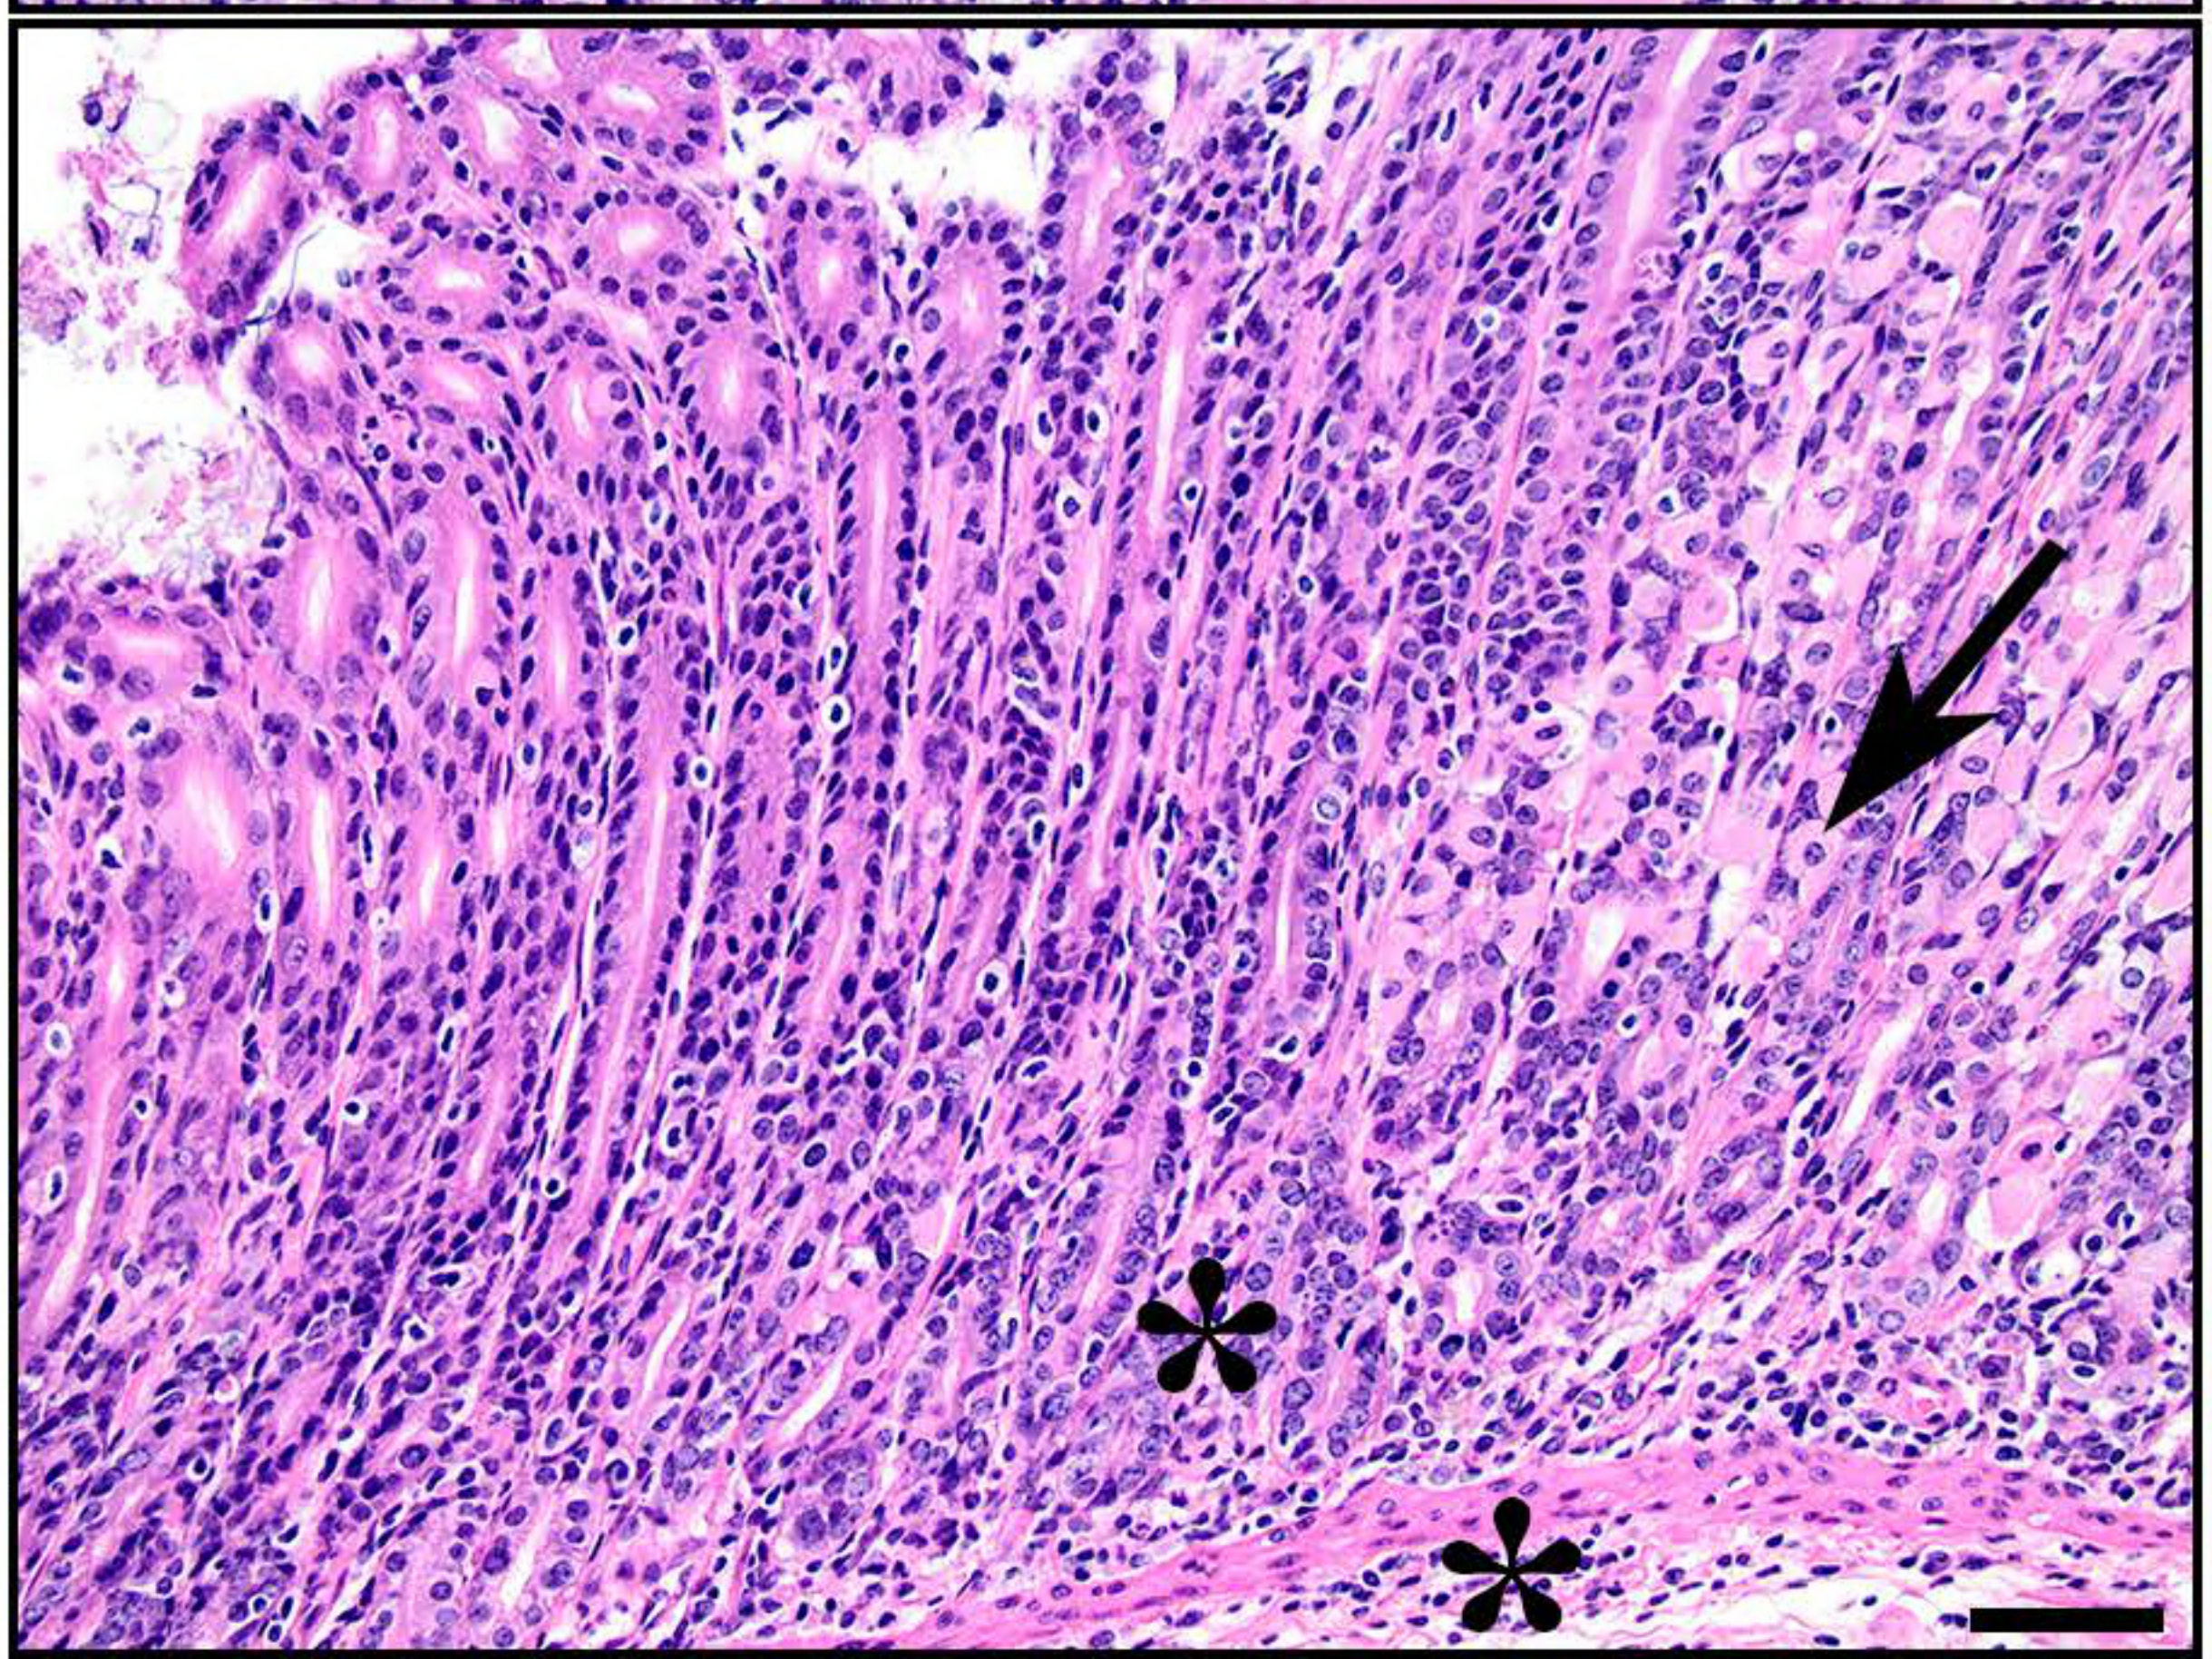



**Figure 5. The  $\Delta csd6$  straight rod mutants elicit less immunopathology compared to wild-type and *csd6* complemented bacteria.** Images of hematoxylin and eosin-stained sections from the three month infection, showing corpus, corpus/antral junction (box), and antral regions of the most severe histopathologic changes in each group. Right panels show higher magnification images (20x) within the enclosed black boxes of 10x images on the left. Arrows point to remaining parietal cells in corpus glands and the asterisks denote sites of infiltrating inflammatory cells. Images are from (A) Mock-infected, (B) wild-type-infected (HAI = 21,  $7.8 \times 10^3$  CFU/g stomach), (C)  $\Delta csd6$ -infected (HAI = 15,  $1.2 \times 10^5$  CFU/g stomach), and (D) *csd6* complemented-infected (HAI = 22,  $4.0 \times 10^4$  CFU/g of stomach) mice. WT, wildtype; comp, complemented; HAI, histological activity index. Left panels scale bar = 100  $\mu\text{m}$ ; right panels scale bar = 50  $\mu\text{m}$ .

# A. Inflammatory Scores

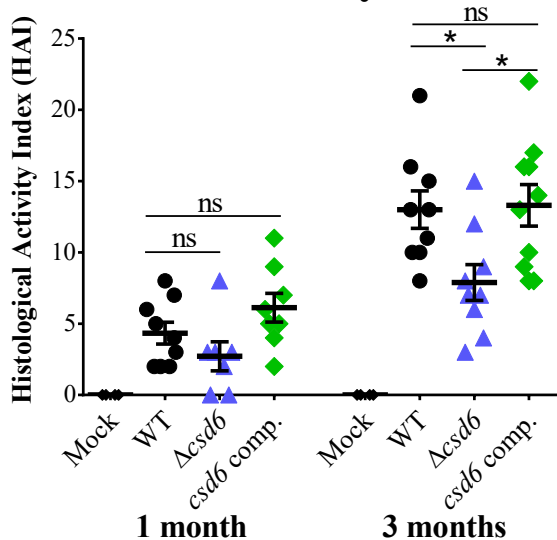

# B. Infection vs. Inflammation

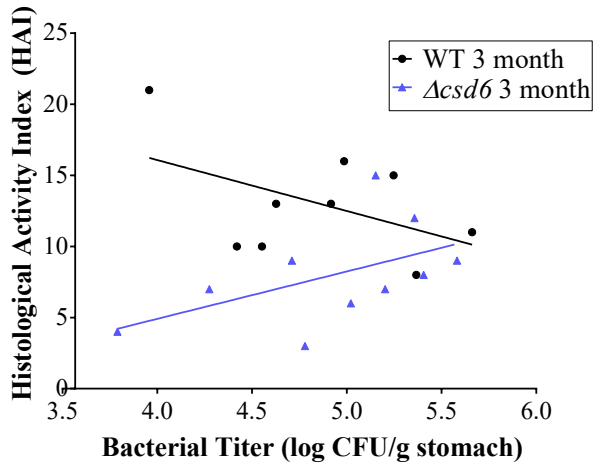

**Figure 6. Chronic  $\Delta csd6$  mutant infections show significantly less histological activity compared to wild-type and  $csd6$  complemented infections.** Thin stomach sections from the mice in **Figure 4A** were used for a blinded analysis of stomach inflammation and pathology. **(A)** The total histological activity index (HAI) is provided for mock-infected (“Mock”), wild-type,  $\Delta csd6$ , and the  $csd6$  complemented strain at one and three months of infection. Mean  $\pm$  standard deviations are shown. \*  $P < 0.05$ , Kruskal-Wallis test with Dunn’s multiple test correction. **(B)** Plot showing the correlation between wild-type and  $\Delta csd6$  stomach colonization loads and total HAI.



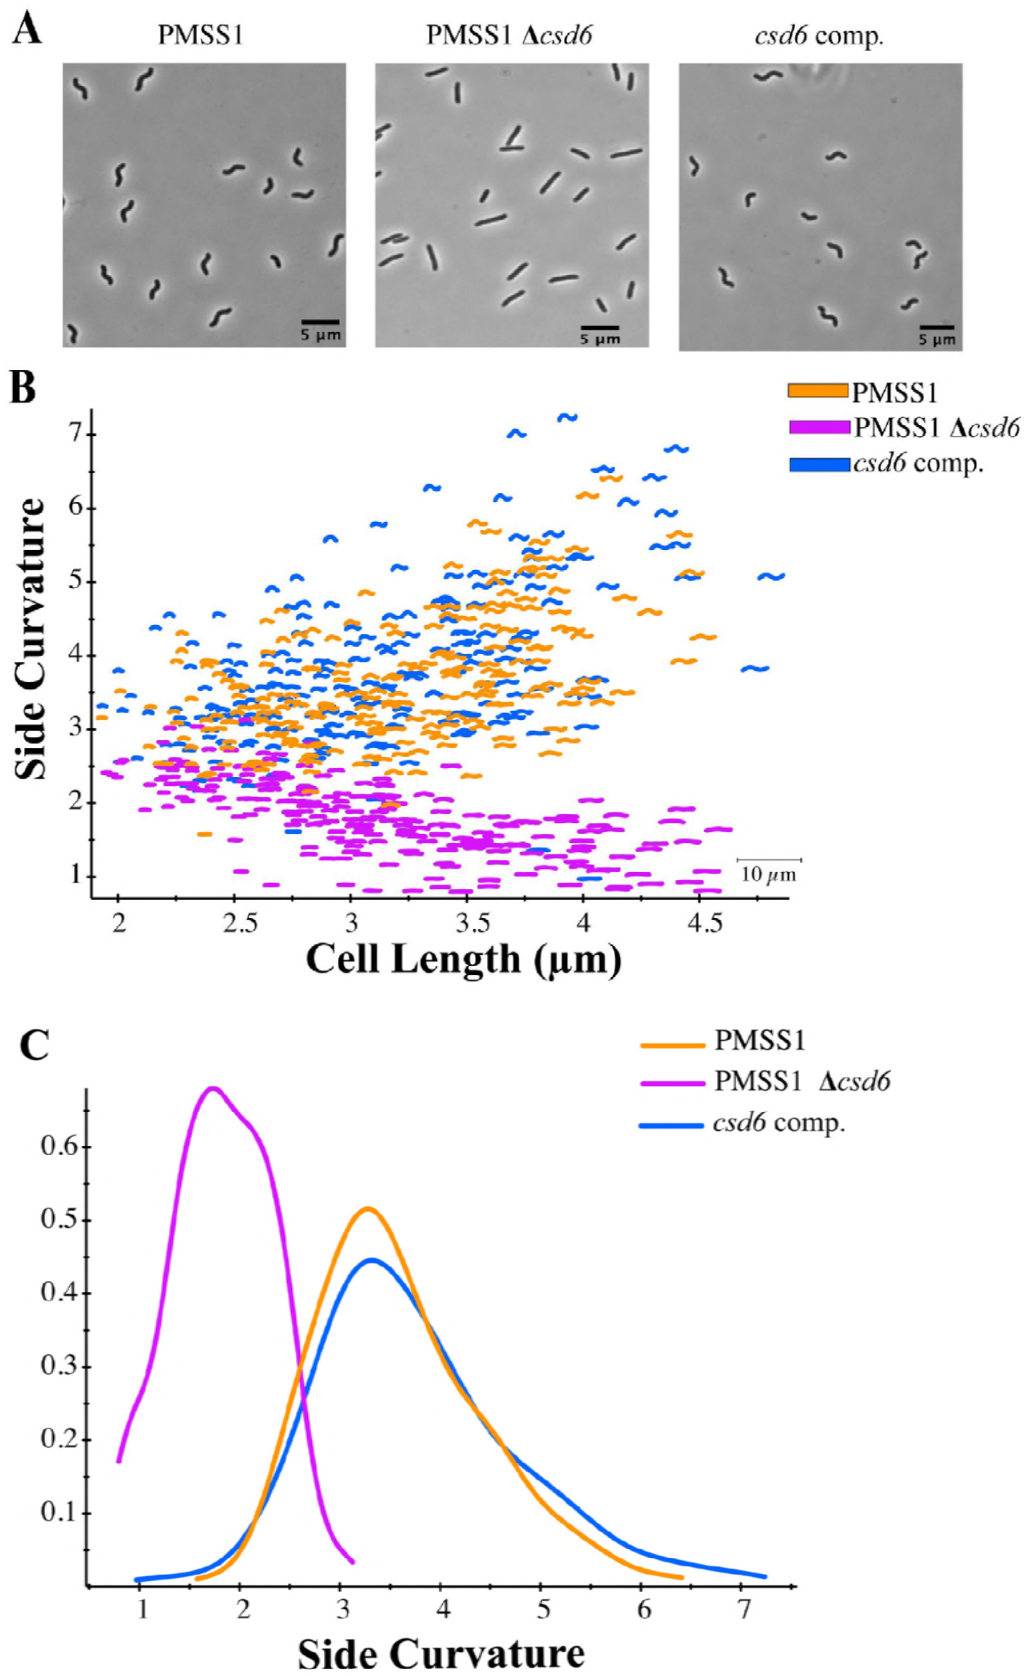

**Figure S1. Complementation of *csd6* restores helical cell shape.** (A) Representative phase contrast images of wild-type PMSS1 bacteria, straight rod ( $\Delta csd6$ ), and *csd6* complemented bacteria. Images were acquired at 100 X (oil immersion objective). Scale bar = 5  $\mu\text{m}$ . (B) Side curvature vs. cell length ( $\mu\text{m}$ ) for individual bacterial cells imaged using phase contrast microscopy of wild-type PMSS1 (orange, n=218),  $\Delta csd6$  (magenta, n=230), and the *csd6* complemented strain (blue, n=212). (C) Smooth histograms summarizing the side curvature distributions acquired for each strain shown in B. No significant difference in side curvature distributions were observed between wild-type and the *csd6* complemented strain ( $p = 0.64078$ ) using Kolmogorov-Smirnov statistics of side curvature distributions. Significant differences in side curvature distributions were observed between wild-type and  $\Delta csd6$ , and between  $\Delta csd6$  and the *csd6* complemented strain, where  $p < 0.00001$ . Data are from two independent experiments.

**A.**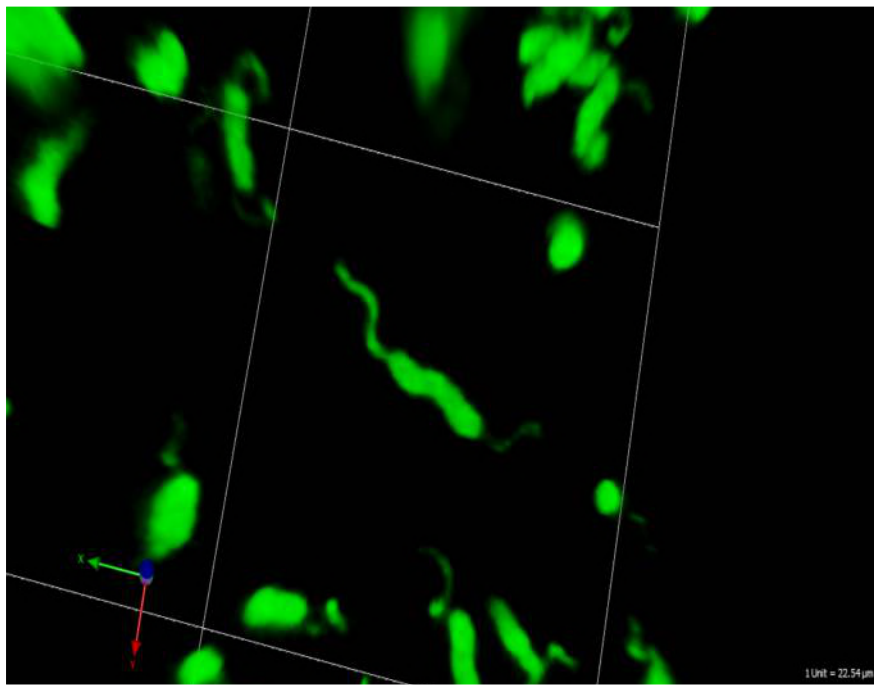**B.**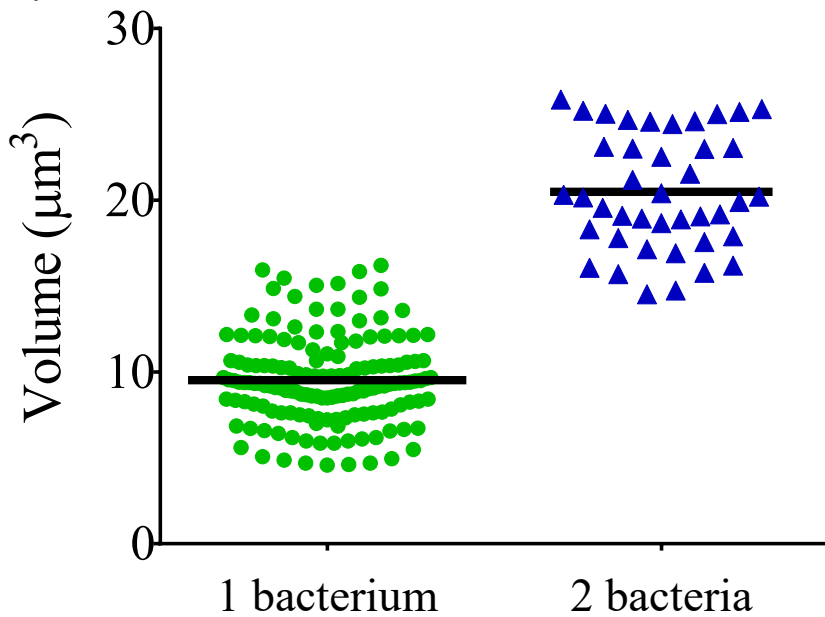

**Figure S2. 3D-visualization of *H. pylori* and bacterial quantitation by volumetric image analysis.** (A) Representative 3D image of wild-type PMSS1 bacteria (green), which was fixed in 2% PFA, embedded in 4% agarose, and sectioned to generate 200  $\mu\text{m}$  thick sections. 3D-images were generated from Z-stacks collected at 63 X (oil-immersion objective) with a Zeiss LSM 780 confocal microscope. (B) Volumetric image analysis of bacterial cells fixed in 2% PFA (n= 203). Bars indicate the mean. Data are from two independent experiments.

A.  $\Delta csd6$

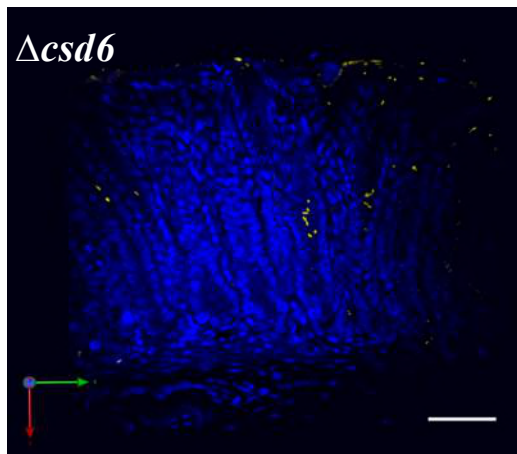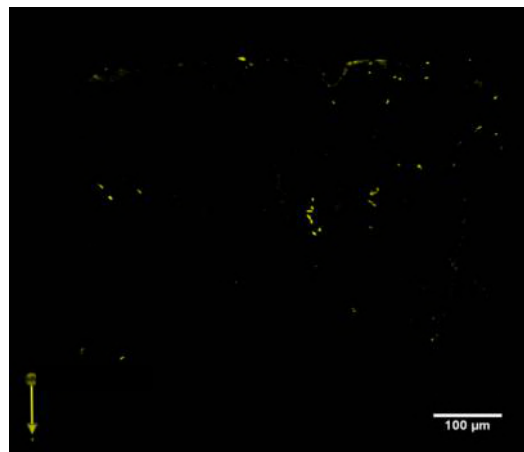

B. *csd6 comp.*

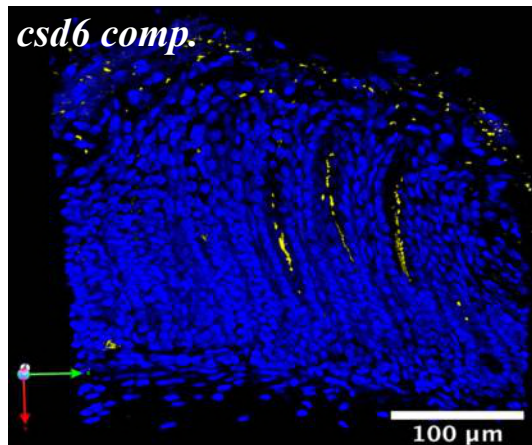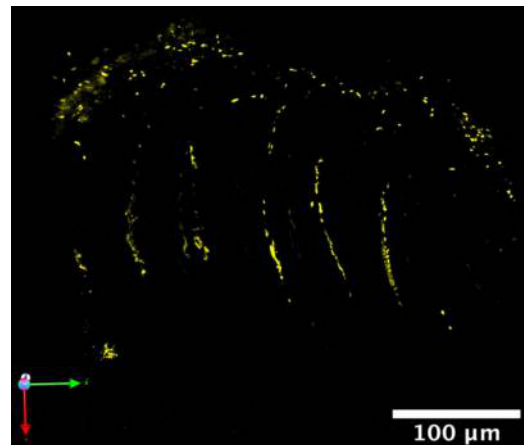

**Figure S3. Visualization of bacteria within gastric glands.** Thick stomach sections from the one week infections shown in **Figure 2A** were stained for *H. pylori*. Shown are representative images of the antrum of a mouse infected with  $\Delta csd6$  (**A**) or *csd6* complemented (**B**) bacteria. Images are maximum intensity projections of Z-stacks, with blue (DAPI, left panel) staining nuclei and yellow staining *H. pylori*. Scale bars = 100  $\mu\text{m}$ . Volumetric analysis for the mouse in **A** is found in **Figure 3C** and **B** is in **Figure 3D**.

**A.**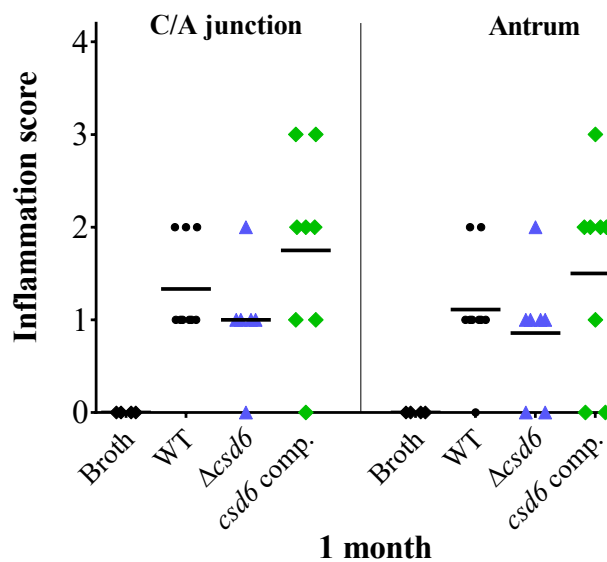**B.**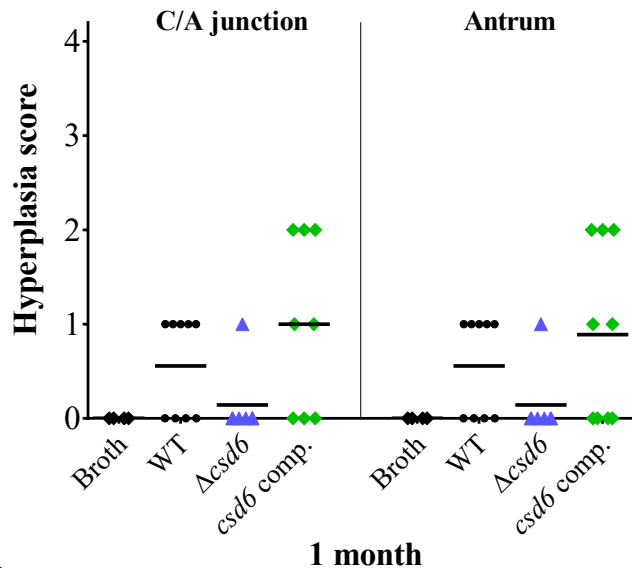**C.**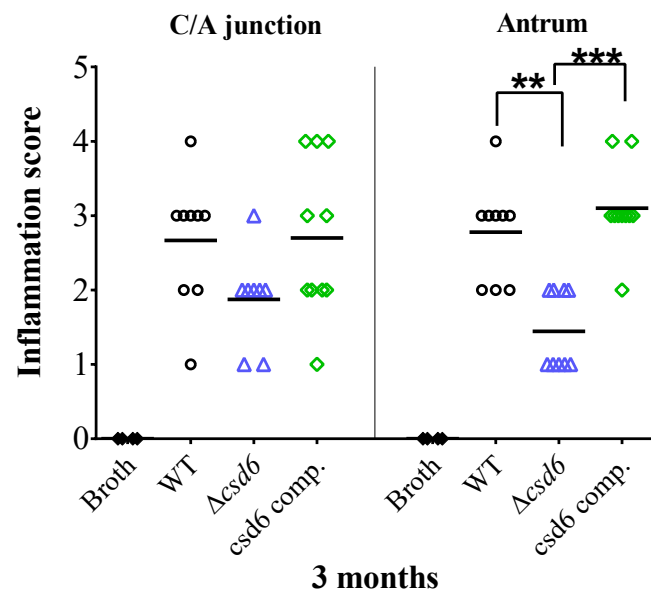**D.**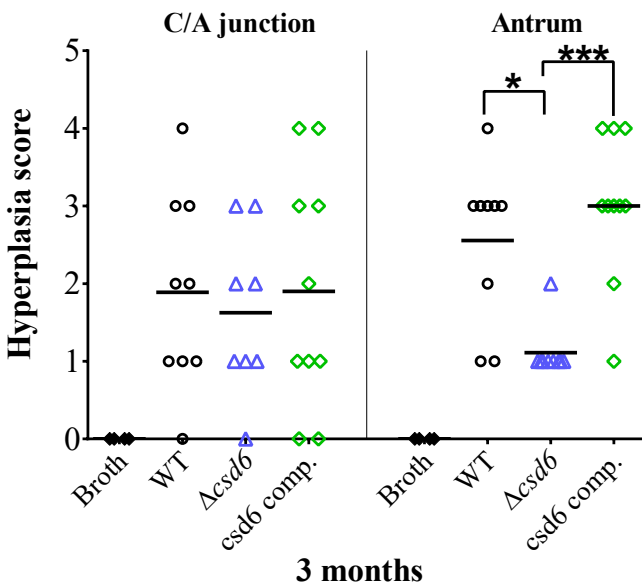



**Figure S4. The  $\Delta csd6$  mutant results in decreased inflammation and hyperplasia scores at one and three months of infection.** Inflammation (A and C) and hyperplasia (B and D) scores in the corpus/antrum (C/A) junction and antrum at one month (A and B) and three months (C and D) of infection (n=9-11 mice per group). Provided are pathological evaluation scores for all gastric tissue sections analyzed and shown in Fig 5. \*  $P < 0.05$ , \*\*  $P < 0.01$ , \*\*\*  $P < 0.001$ , Kruskal-Wallis test with Dunn's multiple test correction.
